# Supplementary material for: Quantifying HIV transmission flow between high-prevalence hotspots and surrounding communities: a population-based study in Rakai, Uganda
Source: PubMed Central journal article supplement (PMC7167508; doi:10.1016/s2352-3018(19)30378-9), 2020-01-14
Supplement: mmc1.pdf [file mmc1.pdf]

# THE LANCET HIV

## Supplementary appendix

This appendix formed part of the original submission and has been peer reviewed. We post it as supplied by the authors.

Supplement to: Ratmann O, Kagaayi J, Hall M, et al. Quantifying HIV transmission flow between high-prevalence hotspots and surrounding communities: a population-based study in Rakai, Uganda. *Lancet HIV* 2020; published online Jan 14. [http://dx.doi.org/10.1016/S2352-3018\(19\)30378-9](http://dx.doi.org/10.1016/S2352-3018(19)30378-9).

## Supplementary Material of

### Quantifying HIV transmission flow between high-prevalence hotspots and surrounding communities: a population-based study in Rakai, Uganda

\*Oliver Ratmann<sup>1</sup>, Joseph Kagaayi<sup>2</sup>, Matthew Hall<sup>3</sup>, Tanya Golubchick<sup>3</sup>, Godfrey Kigozi<sup>2</sup>, Xiaoyue Xi<sup>1</sup>, Chris Wymant<sup>3</sup>, Gertrude Nakigozi<sup>2</sup>, Lucie Abeler-Dörner<sup>3</sup>, David Bonsall<sup>3</sup>, Astrid Gall<sup>4</sup>, Anne Hoppe<sup>5</sup>, Paul Kellam<sup>6</sup>, Jeremiah Bazaale<sup>2</sup>, Sarah Kalibbala<sup>2</sup>, Oliver Laeyendecker<sup>7,8</sup>, Justin Lessler<sup>9</sup>, Fred Nalugoda<sup>2</sup>, Larry W. Chang<sup>2,7,9</sup>, Tulio de Oliveira<sup>10</sup>, Deenan Pillay<sup>5</sup>, Thomas C. Quinn<sup>7,8</sup>, Steven J. Reynolds<sup>2,7,8</sup>, Simon E.F. Spencer<sup>11</sup>, Robert Ssekubugu<sup>2</sup>, David Serwadda<sup>2,12</sup>, Maria J. Wawer<sup>2,9</sup>, Ronald H. Gray<sup>2,9</sup>, Christophe Fraser<sup>3</sup>, \*M. Kate Grabowski<sup>2,10,13</sup>, the Rakai Health Sciences Program and the Pangea HIV Consortium

<sup>1</sup> Department of Mathematics, Imperial College London, London SW72AZ, United Kingdom;

<sup>2</sup> Rakai Health Sciences Program, P.O. Box 279, Kalisizo, Old-Bukoba Road, Uganda;

<sup>3</sup> Oxford Big Data Institute, Li Ka Shing Centre for Health Information and Discovery, Nuffield Department of Medicine, Old Road Campus, University of Oxford, Oxford OX3 7BN, UK;

<sup>4</sup> European Molecular Biology Laboratory-European Bioinformatics Institute (EMBL-EBI), Wellcome Genome Campus, Hinxton, Cambridgeshire CB10 1SD, United Kingdom;

<sup>5</sup> Division of Infection and Immunity, University College London, London WC1E 6BT UK, United Kingdom;

<sup>6</sup> Department of Medicine, Imperial College London, London W12 0HS, United Kingdom;

<sup>7</sup> Department of Medicine, Johns Hopkins School of Medicine, Baltimore, MD 21205, USA;

<sup>8</sup> Division of Intramural Research, National Institute of Allergy and Infectious Diseases, NIH, Bethesda, MD 20892, USA;

<sup>9</sup> Department of Epidemiology, Johns Hopkins Bloomberg School of Public Health, Baltimore, MD 21205, USA;

<sup>10</sup> KwaZulu-Natal Research Innovation and Sequencing Platform (KRISP) College of Health Sciences, University of KwaZulu-Natal, Durban 4041, South Africa;

<sup>11</sup> Department of Statistics, University of Warwick, Coventry CV4 7AL, United Kingdom;

<sup>12</sup> Makerere University School of Public Health, P.O. Box 7072, Kampala, Uganda;

<sup>13</sup> Department of Pathology, Johns Hopkins School of Medicine, Baltimore, MD 21205, USA;

\*Corresponding authors: [oliver.ratmann@imperial.ac.uk](mailto:oliver.ratmann@imperial.ac.uk), +44 020 759 41869; [mgrabow2@jhu.edu](mailto:mgrabow2@jhu.edu)

1 **Supplementary Tables and Figures**

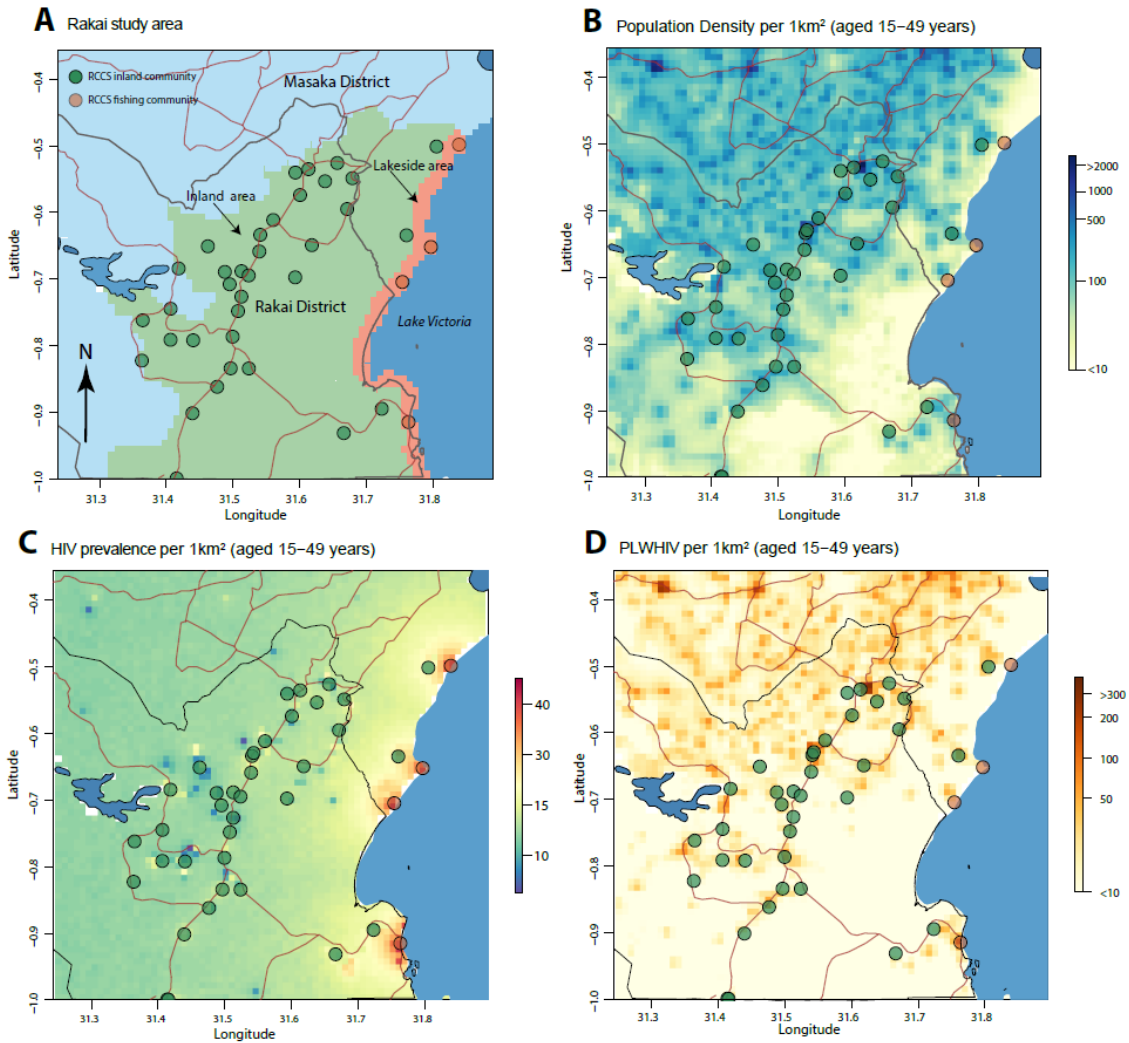

2

3 **Supplementary Figure S1. Inland and fishing populations in the Rakai region. Panel A** Shows RCCS inland  
4 communities in green, and Lake Victoria and fishing communities in brown. The region shown in green was  
5 designated as the RCCS inland (included administrative 2 and 3 units including RCCS communities). The RCCS  
6 included ~75.7% of populations in the lakeside area within 3km of the Lake Victoria shoreline (light brown), and  
7 ~16.2% of populations in the inland area of the Rakai region (light green). Areas classified as external in this study  
8 are shown in light blue. **Panel B** shows estimated population density of persons aged 15-49 years in the Rakai  
9 region; **Panel C** shows estimated HIV prevalence among persons aged 15-49 years in the Rakai region. **Panel D**  
10 shows the estimated number of persons living with HIV (PLWHIV) aged 15-49 years in the Rakai region.

11

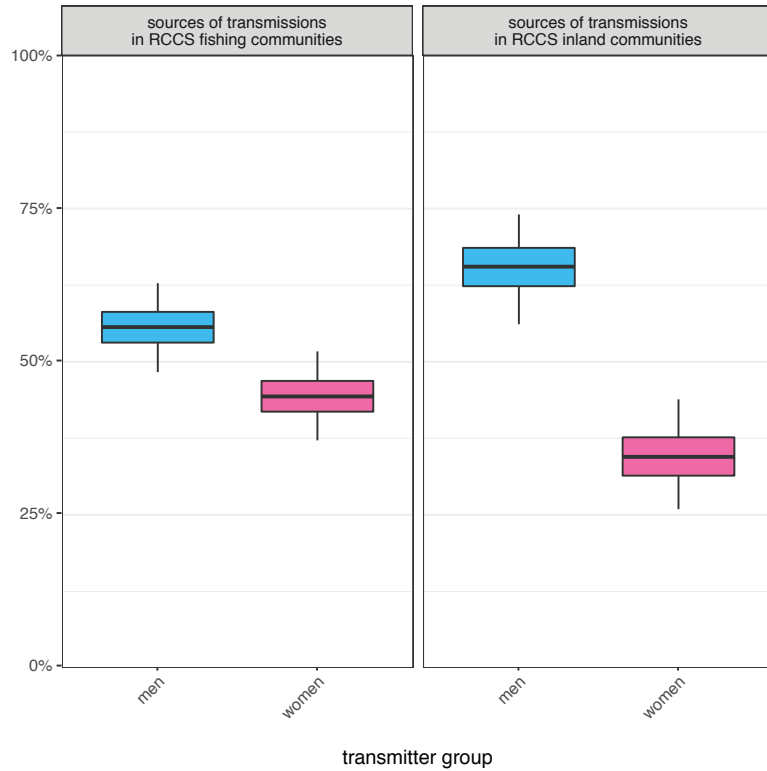

12

13 **Supplementary Figure S2. Sources of transmission in by gender.** To investigate the transmission bias that 60.4%  
 14 (95%CrI: 54.4%-66.3%) of HIV transmissions in RCCS communities originated from men, we considered the  
 15 sources of transmissions in inland and fishing communities after adjusting for sampling bias. Estimates were  
 16 obtained as described in Supplementary Text S2, and adjusted for heterogeneity in participation and sequence  
 17 sampling. In fishing communities, an estimated 44.3% (95%CrI: 37.2%-51.7%) of transmissions originated from  
 18 women, and 55.7% (95%CrI: 48.3%-62.8%) originated from men. In inland communities, an estimated 34.5%  
 19 (95%CrI: 25.9%-43.9%) of transmissions originated from women, and 65.5% (95%CrI: 56.1%-74.1%) originated  
 20 from men.  
 21

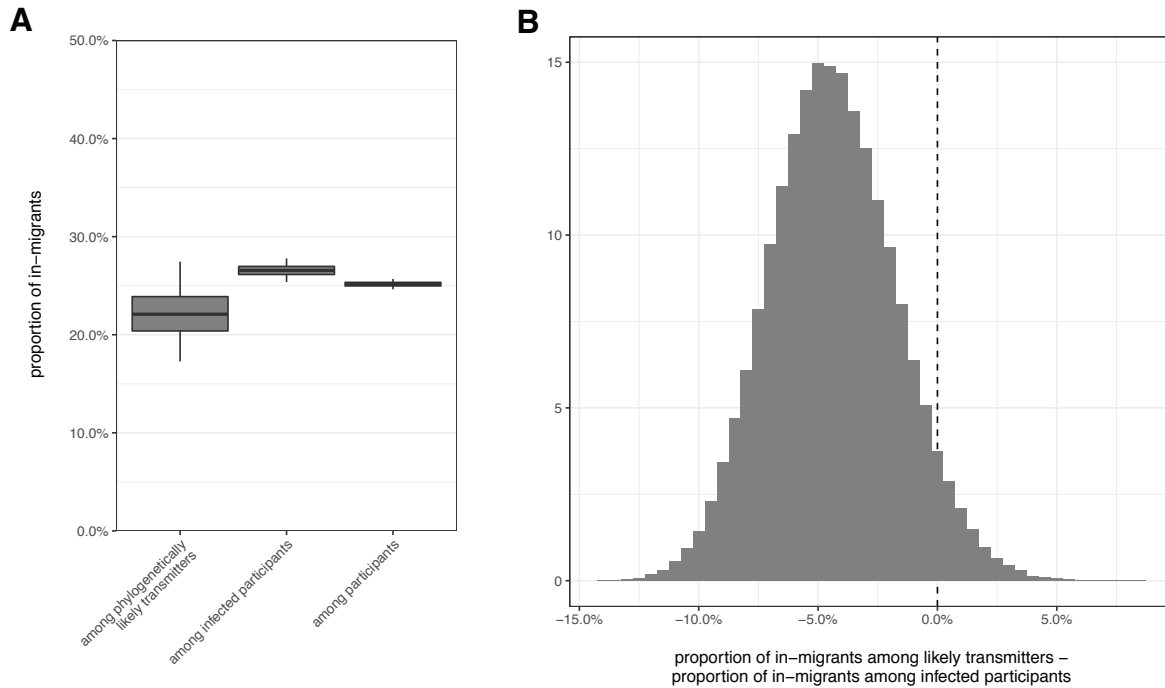

22

23 **Supplementary Figure S3. Sources of transmission by migration status.** To investigate the impact of in-  
 24 migration on HIV transmissions in RCCS communities, we compared the proportion of in-migrants among  
 25 phylogenetically likely transmitters to that among infected RCCS participants and all RCCS participants. **Panel A**  
 26 shows that an estimated 22.1% (95%CrI: 17.3%-27.5%) of transmissions originated from in-migrants, compared to  
 27 26.5% (25.4%-27.8%) of infected participants who were HIV-positive in-migrants, and to 25.2% (24.6%-25.7%) of  
 28 participants who were in-migrants. **Panel B** reports the posterior probability distribution of the estimated proportion  
 29 of transmissions from in-migrants minus the proportion of in-migrants among infected participants. The 95%  
 30 credibility interval was (-9.4%-1.1%), demonstrating that in-migrant did not contribute to the epidemic in excess of  
 31 their overall representation among infected participants, and in fact likely less, although this was not statistically  
 32 significant.

**Supplementary Table 1. Study population and HIV-1 transmission events reconstructed with deep sequence phylogenetic analysis by migration status**

| Population<br>(Location <sup>†</sup> , Gender, Migration Status <sup>†</sup> ) | Individuals eligible<br>to participate | Participants | HIV-1 positive | ART-naïve <sup>§</sup> | Deep sequenced <sup>‡</sup> | Phylogenetic linkage and<br>direction of transmission<br>highly supported <sup>¶</sup> |
|--------------------------------------------------------------------------------|----------------------------------------|--------------|----------------|------------------------|-----------------------------|----------------------------------------------------------------------------------------|
| <b>Total</b>                                                                   | <b>37645</b>                           | <b>25882</b> | <b>5142</b>    | <b>3878</b>            | <b>2652</b>                 | <b>554</b>                                                                             |
| <b>Fishing sites, women</b>                                                    | <b>3792</b>                            | <b>2859</b>  | <b>1352</b>    | <b>1095</b>            | <b>769</b>                  | <b>167</b>                                                                             |
| Resident                                                                       | 2922 (77.1%)                           | 1989 (69.6%) | 957 (70.8%)    | 802 (73.2%)            | 558 (72.6%)                 | 123 (73.7%)                                                                            |
| Migrant from inland community                                                  | 298 (7.9%)                             | 298 (10.4%)  | 140 (10.4%)    | 110 (10%)              | 79 (10.3%)                  | 14 (8.4%)                                                                              |
| Migrant from fishing community                                                 | 13 (0.3%)                              | 13 (0.5%)    | 9 (0.7%)       | 7 (0.6%)               | 6 (0.8%)                    | 2 (1.2%)                                                                               |
| Migrant from external                                                          | 465 (12.3%)                            | 465 (16.3%)  | 186 (13.8%)    | 140 (12.8%)            | 98 (12.7%)                  | 22 (13.2%)                                                                             |
| Migrant, origin unknown                                                        | 94 (2.5%)                              | 94 (3.3%)    | 60 (4.4%)      | 36 (3.3%)              | 28 (3.6%)                   | 6 (3.6%)                                                                               |
| <b>Fishing sites, men</b>                                                      | <b>4737</b>                            | <b>3224</b>  | <b>1087</b>    | <b>964</b>             | <b>745</b>                  | <b>171</b>                                                                             |
| Resident                                                                       | 3871 (81.7%)                           | 2358 (73.1%) | 847 (77.9%)    | 765 (79.4%)            | 587 (78.8%)                 | 140 (81.9%)                                                                            |
| Migrant from inland community                                                  | 238 (5%)                               | 238 (7.4%)   | 61 (5.6%)      | 56 (5.8%)              | 40 (5.4%)                   | 11 (6.4%)                                                                              |
| Migrant from fishing community                                                 | 19 (0.4%)                              | 19 (0.6%)    | 7 (0.6%)       | 6 (0.6%)               | 6 (0.8%)                    | 0 (0%)                                                                                 |
| Migrant from external                                                          | 372 (7.9%)                             | 372 (11.5%)  | 91 (8.4%)      | 83 (8.6%)              | 69 (9.3%)                   | 14 (8.2%)                                                                              |
| Migrant, origin unknown                                                        | 237 (5%)                               | 237 (7.4%)   | 81 (7.5%)      | 54 (5.6%)              | 43 (5.8%)                   | 6 (3.5%)                                                                               |
| <b>Inland communities, women</b>                                               | <b>15154</b>                           | <b>10932</b> | <b>1797</b>    | <b>1156</b>            | <b>678</b>                  | <b>112</b>                                                                             |
| Resident                                                                       | 12146 (80.2%)                          | 7924 (72.5%) | 1248 (69.4%)   | 755 (65.3%)            | 473 (69.8%)                 | 87 (77.7%)                                                                             |
| Migrant from inland community                                                  | 1372 (9.1%)                            | 1372 (12.6%) | 258 (14.4%)    | 195 (16.9%)            | 106 (15.6%)                 | 16 (14.3%)                                                                             |
| Migrant from fishing community                                                 | 18 (0.1%)                              | 18 (0.2%)    | 5 (0.3%)       | 5 (0.4%)               | 2 (0.3%)                    | 2 (1.8%)                                                                               |
| Migrant from external                                                          | 1238 (8.2%)                            | 1238 (11.3%) | 185 (10.3%)    | 145 (12.5%)            | 72 (10.6%)                  | 6 (5.4%)                                                                               |
| Migrant, origin unknown                                                        | 380 (2.5%)                             | 380 (3.5%)   | 101 (5.6%)     | 56 (4.8%)              | 25 (3.7%)                   | 1 (0.9%)                                                                               |
| <b>Inland communities, men</b>                                                 | <b>13962</b>                           | <b>8867</b>  | <b>906</b>     | <b>663</b>             | <b>460</b>                  | <b>104</b>                                                                             |
| Resident                                                                       | 12195 (87.3%)                          | 7100 (80.1%) | 725 (80%)      | 518 (78.1%)            | 374 (81.3%)                 | 87 (83.7%)                                                                             |
| Migrant from inland community                                                  | 690 (4.9%)                             | 690 (7.8%)   | 81 (8.9%)      | 65 (9.8%)              | 36 (7.8%)                   | 9 (8.7%)                                                                               |
| Migrant from fishing community                                                 | 9 (0.1%)                               | 9 (0.1%)     | 3 (0.3%)       | 3 (0.5%)               | 3 (0.7%)                    | 2 (1.9%)                                                                               |
| Migrant from external                                                          | 635 (4.5%)                             | 635 (7.2%)   | 45 (5%)        | 41 (6.2%)              | 18 (3.9%)                   | 5 (4.8%)                                                                               |
| Migrant, origin unknown                                                        | 433 (3.1%)                             | 433 (4.9%)   | 52 (5.7%)      | 36 (5.4%)              | 29 (6.3%)                   | 1 (1%)                                                                                 |

\* RCCS communities on the shore of Lake Victoria were classified as fishing site, and all others as inland communities.  
† Individuals who in-migrated into an RCCS community in the two years before their first survey visit were classified as an in-migrant, and otherwise as resident. Origins of migration were geo-located from interview data.  
§ Infected individuals who did not self-report use of ART.  
‡ Infected ART-naïve individuals who had deep sequences at sufficient quality for analysis, defined as reads of length at least 250nt that covered a minimum of 750nt of the HIV-1 genome at a sequencing depth of 30X.  
¶ Sequenced individuals who were phylogenetically close, adjacent, and ancestral in the same direction to another individual in viral deep-sequence phylogenies across 60% of the HIV-1 genome.

**Supplementary Table 2. HIV-1 transmissions among RCCS communities by source location**

| Source population     | Recipient population  | Estimated contribution to overall HIV-1 transmissions among RCCS communities * | Predicted contribution to overall HIV-1 transmission among Rakai subdistricts ** |
|-----------------------|-----------------------|--------------------------------------------------------------------------------|----------------------------------------------------------------------------------|
|                       |                       | (mean, 95% credibility interval of posterior density)                          | (mean, 95% credibility interval of posterior predictive density)                 |
| <b>Overall</b>        |                       |                                                                                |                                                                                  |
| Fishing sites         | Fishing sites         | 76.4% (69.7%-82.4%)                                                            | 54.8% (42.2%-69%)                                                                |
| Inland communities    | Fishing sites         | 13.4% (8.8%-19.1%)                                                             | 45.2% (31%-57.8%)                                                                |
| External to RCCS      | Fishing sites         | 10% (6.1%-15.2%)                                                               | --                                                                               |
| Fishing sites         | Inland communities    | 8.3% (4%-14.9%)                                                                | 1.9% (0.7%-3.9%)                                                                 |
| Inland communities    | Inland communities    | 85.4% (77.6%-91.4%)                                                            | 98.1% (96.1%-99.3%)                                                              |
| External to RCCS      | Inland communities    | 5.9% (2.3%-11.7%)                                                              | --                                                                               |
| <b>By gender</b>      |                       |                                                                                |                                                                                  |
| M, Fishing sites      | F, Fishing sites      | 78.5% (69.4%-86.1%)                                                            | 54% (37.2%-73.7%)                                                                |
| M, Inland communities | F, Fishing sites      | 12.9% (7.1%-20.9%)                                                             | 46% (26.3%-62.8%)                                                                |
| M, External to RCCS   | F, Fishing sites      | 8.1% (3.8%-14.8%)                                                              | --                                                                               |
| M, Fishing sites      | F, Inland communities | 11.6% (5.3%-21%)                                                               | 2.6% (0.9%-5.7%)                                                                 |
| M, Inland communities | F, Inland communities | 82.2% (71.7%-90.2%)                                                            | 97.4% (94.3%-99.1%)                                                              |
| M, External to RCCS   | F, Inland communities | 5.7% (1.7%-13.1%)                                                              | --                                                                               |
| F, Fishing sites      | M, Fishing sites      | 74% (63.5%-83.1%)                                                              | 56.8% (38.9%-77.2%)                                                              |
| F, Inland communities | M, Fishing sites      | 13.6% (7.2%-22.4%)                                                             | 43.2% (22.8%-61.1%)                                                              |
| F, External to RCCS   | M, Fishing sites      | 11.9% (5.9%-20.6%)                                                             | --                                                                               |
| F, Fishing sites      | M, Inland communities | 1.6% (0.1%-8.1%)                                                               | 0.4% (0%-2.7%)                                                                   |
| F, Inland communities | M, Inland communities | 92.3% (80.4%-98.1%)                                                            | 99.6% (97.3%-100%)                                                               |
| F, External to RCCS   | M, Inland communities | 5.4% (0.8%-16.6%)                                                              | --                                                                               |

\* Estimates based on phylogenetically reconstructed events, and adjusted for participation and sequencing differences via Bayesian multi-level model; see Supplementary Text S2. \*\* Predictions based on fitted Bayesian multi-level model, and extrapolating from eligible individuals who live in RCCS communities to the inland and fishing areas shown in Figure 1A; see Supplementary Text S3.

**Supplementary Table 3. HIV-1 transmissions among RCCS communities by recipient location**

| Source population     | Recipient population  | Estimated contribution to overall HIV-1 transmissions among RCCS communities * | Predicted contribution to overall HIV-1 transmission among Rakai subdistricts ** |
|-----------------------|-----------------------|--------------------------------------------------------------------------------|----------------------------------------------------------------------------------|
|                       |                       | (mean, 95% credibility interval of posterior density)                          | (mean, 95% credibility interval of posterior predictive density)                 |
| <b>Overall</b>        |                       |                                                                                |                                                                                  |
| Fishing sites         | Fishing sites         | 92.8% (87.1%-96.5%)                                                            | 75.2% (59.2%-89.1%)                                                              |
| Fishing sites         | Inland communities    | 7.2% (3.5%-12.9%)                                                              | 24.8% (10.9%-40.8%)                                                              |
| Inland communities    | Fishing sites         | 18% (11.9%-25.5%)                                                              | 4.6% (2.5%-7.6%)                                                                 |
| Inland communities    | Inland communities    | 82% (74.5%-88.1%)                                                              | 95.4% (92.4%-97.5%)                                                              |
| External to RCCS      | Fishing sites         | 70.3% (49.3%-87%)                                                              | --                                                                               |
| External to RCCS      | Inland communities    | 29.7% (13%-50.7%)                                                              | --                                                                               |
| <b>By gender</b>      |                       |                                                                                |                                                                                  |
| M, Fishing sites      | F, Fishing sites      | 89% (80.1%-94.9%)                                                              | 66.2% (46.8%-85.4%)                                                              |
| M, Fishing sites      | F, Inland communities | 11% (5.1%-19.9%)                                                               | 33.8% (14.6%-53.2%)                                                              |
| M, Inland communities | F, Fishing sites      | 15.8% (8.6%-25.5%)                                                             | 4.3% (1.8%-8.4%)                                                                 |
| M, Inland communities | F, Inland communities | 84.2% (74.5%-91.4%)                                                            | 95.7% (91.6%-98.2%)                                                              |
| M, External to RCCS   | F, Fishing sites      | 63% (34.5%-87%)                                                                | --                                                                               |
| M, External to RCCS   | F, Inland communities | 37% (13%-65.5%)                                                                | --                                                                               |
| F, Fishing sites      | M, Fishing sites      | 98.8% (94%-99.9%)                                                              | 94.8% (71.2%-100%)                                                               |
| F, Fishing sites      | M, Inland communities | 1.2% (0.1%-6%)                                                                 | 5.2% (0%-28.8%)                                                                  |
| F, Inland communities | M, Fishing sites      | 21.1% (11.2%-34%)                                                              | 4.9% (1.9%-10.1%)                                                                |
| F, Inland communities | M, Inland communities | 78.9% (66%-88.8%)                                                              | 95.1% (89.9%-98.1%)                                                              |
| F, External to RCCS   | M, Fishing sites      | 80% (49.3%-96.7%)                                                              | --                                                                               |
| F, External to RCCS   | M, Inland communities | 20% (3.3%-50.7%)                                                               | --                                                                               |

\* Estimates based on phylogenetically reconstructed events, and adjusted for participation and sequencing differences via Bayesian multi-level model; see Supplementary Text S2. \*\* Predictions based on fitted Bayesian multi-level model, and extrapolating from eligible individuals who live in RCCS communities to the inland and fishing areas shown in Figure 1A; see Supplementary Text S3.

39

**Supplementary Table 4. Rakai sub-districts with RCCS surveillance over the study period.**

| Geographic area | Gender | Estimated population, ages 15-49 years | Estimated infected population, ages 15-49 years | Census-eligible population in RCCS communities, ages 15-49 years | Study participants in RCCS communities, ages 15-49 years | Infected population in RCCS communities, ages 15-49 years |
|-----------------|--------|----------------------------------------|-------------------------------------------------|------------------------------------------------------------------|----------------------------------------------------------|-----------------------------------------------------------|
|                 |        | #                                      | # (%HIV+)                                       | #                                                                | #                                                        | # (%HIV+)                                                 |
| lakeside        | F      | 2981                                   | 837 (28.1%)                                     | 3792                                                             | 2859                                                     | 1352 (47.3%)                                              |
| lakeside        | M      | 2655                                   | 558 (21.0%)                                     | 4737                                                             | 3224                                                     | 1087 (33.7%)                                              |
| inland          | F      | 98476                                  | 14927 (15.1%)                                   | 15154                                                            | 10932                                                    | 1797 (16.4%)                                              |
| inland          | M      | 81506                                  | 9951 (12.2%)                                    | 13962                                                            | 8867                                                     | 906 (10.2%)                                               |

40



## Supplementary Text S1 Rakai Community Cohort Study

### S1.1 RCCS Recruitment and follow-up

The Rakai Community Cohort Study (RCCS), conducted by the Rakai Health Sciences Program (RHSP), is an open, population-based, multi-community cohort of individuals aged 15–49 years. To identify eligible cohort participants, a household census enumerates all persons by gender, age, and duration of residence, irrespective of age, and whether they are present or currently absent. Eligible individuals are then invited to come to a central hub in the community for RCCS consent and enrolment. At the hub, individuals undergo group consent procedures (information is provided to a group at a time), followed by individual consent which is conducted in private by a trained RCCS interviewer/counsellor. Two attempts are made to contact individuals at their home if they were censused and eligible but who do not present at the hubs for survey. Mobile phone outreach is also performed for survey participants from prior rounds who are not present at subsequent surveys. There are no specific incentives for follow-up given, but all participants are compensated for time and travel.

For this study, participants were enrolled between August 10, 2011 and January 30, 2015. Figure S4 illustrates the distribution of first survey visit times of participants in inland and fishing communities, showing that the two populations were surveyed concurrently.

### S1.2 RCCS survey procedures

Each RCCS survey round collects detailed interview data (sociodemographic, behavioral, sexual network, health care utilization, pregnancy and childbearing, health status) consenting residents aged 15–49. Interviews are conducted in private by trained same sex interviews in the local language, Luganda, with direct data entry into password protected encrypted mobile PCs.

As part of the survey, all RCCS participants are offered free voluntary counseling and HIV testing if they previously tested HIV-negative in a prior RCCS survey or their HIV status is unknown. The vast majority (>90%) of participants over the lifetime of the cohort consent to be tested, and to receive their results. A small percentage (<5%) agree to be tested but choose not to receive their HIV results. HIV rapid testing is performed using a validated algorithm, and results are returned to participants immediately through on-site post-test counselors.

All consenting participants, irrespective of HIV status, are also provide a venous blood sample for storage/future testing, including viral phylogenetic studies. Blood is collected in EDTA tubes, and after collection, which occurs at the hub, specimens are stored in a cool box until transport to the central RHSP laboratory. After specimen arrival to the central lab, specimens are centrifuged, and plasma is separated into 1 ml aliquots for storage. Aliquots are labelled with participants' unique alphanumeric ID, and stored at -80°C in a designated freezer facility on site. In case of power failure in the grid, the freezer facility is connected to a generator house with two backup 200 KVA and one 150 KVA generators, UPSs, 24 inverters, and a 20-battery backup for uninterrupted power.

### S1.3 Viral sequencing

HIV-1 deep sequences were generated from blood samples of HIV infected study participants who did not report ART use. This selection criterion was motivated by the fact that self-reported ART use reflected actual ART use with high specificity and sensitivity in a previous validation study(1), and that 90% of individuals who reported ART use had suppressed virus below 1,000 copies per mL of plasma(2), below which viral deep sequencing was not possible with our protocol(3). If an individual participated in more than one survey over the observation period and they reported no ART use at multiple visits, only the sample at the initial visit at which they reported no ART use was scheduled for sequencing. If an individual was observed multiple times and initially reported ART use but at a later visit did not, the sample of the first visit at which they did not report ART use during the observation period was scheduled for sequencing. Thus, one sample per participant was scheduled for sequencing, and it was the first visit at which they did not report ART use during the observation period. Samples scheduled for sequencing were shipped to University College London Hospital, London, United Kingdom for viral RNA extraction. RNA extraction was automated on QIASymphony SP workstations with the QIA- symphony DSP Virus/Pathogen Kit (Cat. No. 937036, 937055; Qiagen, Hilden, Germany), followed by one-step reverse transcription polymerase chain reaction (RT-PCR). Deep-sequencing was performed on Illumina MiSeq and HiSeq instruments in the DNA pipelines core facility at the Wellcome Trust Sanger Institute, Hinxton, United Kingdom.

96 2,652 individuals had viral deep-sequences generated that satisfied minimum quality criteria for phylogenetic  
 97 analysis(4). Figure S5 illustrates the sequence sampling times of these individuals, indicating that the sampling of  
 98 the populations in fishing and inland communities overlapped in time.  
 99

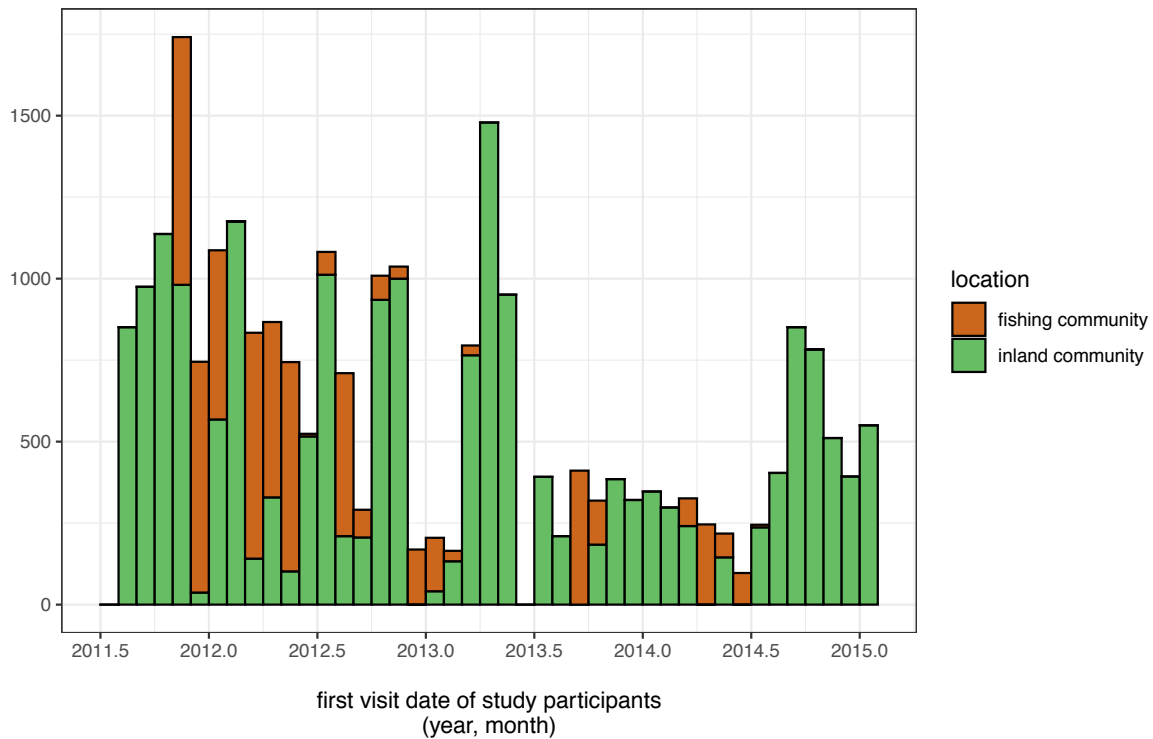

100

101 **Supplementary Figure S4. Survey dates in inland and fishing communities.** 25,882 individuals in 40  
 102 communities participated in the Rakai Community Cohort Study from August 10, 2011 to January 30, 2015. The  
 103 histogram shows the number of study participants in inland communities (green), and fishing communities (brown)  
 104 by month in the observation period. In inland communities, the first and last visit dates were respectively August 10,  
 105 2011 and January 30, 2015. In fishing communities, the first and last visit dates were respectively November 4, 2011  
 106 and October 2, 2014.  
 107

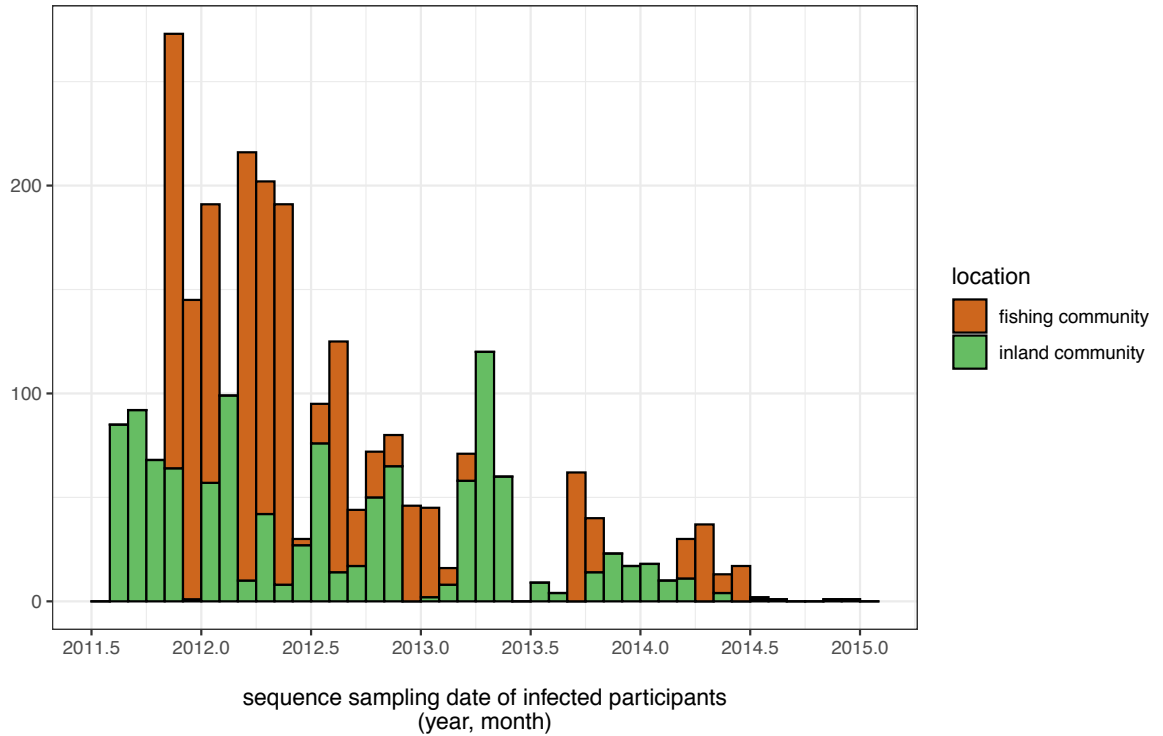

108  
 109  
 110  
 111  
 112  
 113

**Supplementary Figure S5. Sampling dates associated with viral sequences in inland and fishing communities.** From 2,652 individuals, viral sequences could be obtained that satisfied minimum criteria on read length and read depth(4). Overall, the sequences were obtained from participants visited from August 10, 2011 to December 3, 2014. In inland communities, the respective dates were August 10, 2011 to December 3, 2014. In fishing communities, the respective dates were November 21, 2011 to July 3, 2014.

## 114 **Supplementary Text S2 Statistical analysis of transmission flows between surveyed** 115 **communities**

116

### 117 **S2.1 Source attribution model**

#### 118 **Input data from phyloscanner deep sequence analysis**

119 2,652 individuals of 3,878 HIV-infected individuals who did not report ART use were deep-sequenced satisfying  
120 minimum quality criteria for phylogenetic analysis, and the phyloscanner software was used to reconstruct their viral  
121 phylogenetic relationships(5). Full details are described in Ratmann et al.(4). Briefly: in a first stage, pairs of  
122 individuals who had phylogenetically close virus across the HIV-1 genome were identified. Individuals were  
123 randomly assigned to batches of individuals, and phyloscanner was run on viral deep-sequence data from individuals  
124 in each pairwise combination of batches. This allowed identification of all pairs of individuals with phylogenetically  
125 close virus. Potential transmission networks were then constructed by grouping individuals who had  
126 phylogenetically close virus to at least one other individual. In a second stage, phyloscanner was run on viral deep-  
127 sequence data from all individuals in a potential transmission network, and sequences from the ~10 most  
128 phylogenetically closely related individuals not in the potential network that acted as controls. The topology of deep-  
129 sequence trees and phylogenetic distance were used to confirm membership of individuals in a transmission  
130 network, and to estimate the direction of transmission within networks. Each network was described with two  
131 adjacency matrices  $L$  and  $D$  that quantified respectively the strength of phylogenetic evidence for direct transmission  
132 (linkage) between two individuals in the network, and the strength of phylogenetic evidence for the direction of  
133 transmission between two individuals in the network. The cell entry  $L_{ij}$  was obtained by counting the number of  
134 deep-sequence phylogenies with evidence for linkage across the HIV-1 genome, and then adjusting the raw count  
135 for the extent of overlap in the read alignments from which the deep-sequence phylogenies were reconstructed. The  
136 cell entry  $D_{ij}$  was obtained by counting the number of deep-sequence phylogenies with evidence for transmission  
137 direction from  $i$  to  $j$ , and then by adjusting the raw count for the extent of overlap in the read alignments from which  
138 the deep-sequence phylogenies were reconstructed. Two individuals were defined as a phylogenetically likely  
139 transmission pair with strong support for the direction of transmission (source-recipient pair) if  $L_{ij}/K > c$  and  
140  $D_{ij}/L_{ij} > c$ , where  $c = 0.6$ . 293 source-recipient pairs were reconstructed.

141

#### 142 **Definition of inland, fishing, and external populations for source attribution**

143 Figure 1A shows the 36 inland and four fishing communities that were part of the RCCS between August 2011 and  
144 January 2015. All study participants and source-recipient pairs resided in one of these communities at time of  
145 survey, of whom a quarter had migrated into RCCS communities within two years before to study visit (see main  
146 text). To account for these population movements, inland and fishing populations were defined more broadly. The  
147 northernmost and southernmost RCCS communities were located at latitudes -0.406 and -0.999 respectively. Fishing  
148 populations were defined to be located within 3km to the shores of Lake Victoria within latitudes -0.406 and -0.999.  
149 The 3km range was chosen so that the lakeside area contained all households belonging to Lake Victoria fishing  
150 communities, and so that the geographic center of all inland communities was not in the lakeside area. Inland  
151 populations were defined to be sub-districts where RCCS surveillance took place within the same latitude range,  
152 with the exception of fishing populations. External populations were defined to be outside sub-districts where RCCS  
153 surveillance took place, or beyond latitudes -0.406 and -0.999. Supplementary Figure S1 illustrates the locations of  
154 inland, fishing and external populations.

155

#### 156 **Crude estimate of transmission flows**

157 The aim of analysis is to estimate the population-level proportion of transmissions  $\pi_{ab}$  from population sub-group  $a$   
158 to population sub-group  $b$ . Every individual is assumed to be part of one stratum. In this study, we focused on  
159 estimating transmission flows by location, with the population stratified either in three groups (fishing, inland or  
160 external populations), or stratified in six groups (fishing:men, fishing:women, inland:men, inland:women,  
161 external:men, external:women). To introduce notation, suppose there are in total  $z_{ab}$  transmissions from group  $a$  to  
162 group  $b$ , of which  $n_{ab}$  are observed in a cross-sectional population-based sample, with corresponding totals  $Z =$   
163  $\sum_{a,b} z_{ab}$ , and  $N = \sum_{a,b} n_{ab}$ . Table 1 left column reports the number of observed transmission events  $n_{ab}$ , and the  
164 crude estimate  $\tilde{\pi}_{ab} = n_{ab}/N$ . Under the assumption that individuals are sampled at random with probability  $\xi_a$  in  
165 stratum  $a$ , then on expectation

166

$$E[\tilde{\pi}_{ab}] = (z_{ab}\xi_a\xi_b)/(\sum_{c,d} z_{cd}\xi_c\xi_d)$$

167 and  $\tilde{\pi}_{ab}$  is an unbiased estimator of  $\pi_{ab}$  if the sampling probabilities are homogeneous, i.e.  $\xi_a$  is independent of  $a$   
 168 for all strata  $a$  and just a constant. This is usually not the case.

169  
 170 **Bayesian data augmentation model**

171 For the case that sampling probabilities are not homogeneous, we developed the following Bayesian multi-level  
 172 model to obtain sampling-adjusted estimates of  $\pi_{ab}$ . The central assumption we make is that prior information on  $\xi_a$   
 173 are available, for example through enumeration and surveillance of the entire study population. Define the vector  
 174  $\mathbf{n} = (n_{ab})$  to be the number of observed transmission flow counts for all pairwise strata combinations considered,  
 175  $n_{ab} \geq 0$ , e.g. fishing->fishing, fishing->inland, inland->fishing, inland->inland, or men->women, and women-  
 176 >men. Due to population movement, the basic scenario that we consider includes fishing->fishing, fishing->inland,  
 177 inland->fishing, inland->inland, external->fishing, and external->inland, and so the length of  $\mathbf{n}$  is  $L = 6$ . Also  
 178 denote the vectors  $\mathbf{z} = (z_{ab})$ ,  $\boldsymbol{\pi} = (\pi_{ab})$ ,  $\boldsymbol{\xi} = (\xi_a)$ . Assuming that source-recipient pairs are independent, we  
 179 consider the model

$$\begin{aligned} \mathbf{z} &\sim \text{Multinomial}(Z, \boldsymbol{\pi}) \\ n_{ab} &\sim \text{Binomial}(z_{ab}, \xi_a \xi_b) \\ \xi_a &\sim p(\xi_a) \\ Z &\sim p(Z) \\ \boldsymbol{\pi} &\sim p(\boldsymbol{\pi}) \end{aligned}$$

185 where the counts  $n_{ab}$  are observed,  $\boldsymbol{\pi}$  are the target parameters, and  $\mathbf{z}$ ,  $Z$ ,  $\xi_a$  are latent parameters. The Bayesian  
 186 model allows incorporation of information on the sampling probability for all strata through the prior distributions  
 187  $p(\xi_a)$ , for example through Beta distributions that are centered at particular values and with particular precision.  
 188 The prior distribution on the total number of transmissions,  $p(Z)$ , can also be specified based on available sampling  
 189 information, by setting  $p(Z)$  to a truncated Poisson distribution with lower limit  $N$  and median around  $N$  divided by  
 190 the average sampling fraction of the population. The prior distribution on  $\boldsymbol{\pi}$  was set to an uninformative conjugate  
 191 Dirichlet distribution with constant hyper-parameters  $\boldsymbol{\lambda} = (\lambda_{ab})$ ,  $\lambda_{ab} = 0.8/L$ . The joint posterior distribution  
 192  $p(\boldsymbol{\pi}, \mathbf{z}, Z, \boldsymbol{\xi} | \mathbf{n})$  can be estimated via Markov Chain Monte Carlo, including high-dimensional cases when the  
 193 number of transmission flows to be estimated exceeds 100. The algorithm is available at [https://github.com/BDI-](https://github.com/BDI-pathogens/phyloscanner/phyloflows)  
 194 [pathogens/phyloscanner/phyloflows](https://github.com/BDI-pathogens/phyloscanner/phyloflows), version 1.1.0. The main simplifying assumption of this model is that  
 195 phylogenetically reconstructed transmission events are assumed to be independent in the Multinomial data  
 196 likelihood, which can be inappropriate when reconstructed transmission networks are large. When the large majority  
 197 of reconstructed transmission networks consists of two individuals as in the Rakai data, the independence  
 198 assumption is not overly restrictive.

199  
 200 **S2.2 Application to Rakai data**  
 201 **Overall model specification**

202 We applied the source attribution model in section S2.1 to estimate HIV transmission flows between inland and  
 203 fishing communities of the RCCS. The phylogenetic data consisted of 293 source-recipient pairs that were  
 204 reconstructed through deep-sequence viral phylogenetic analysis of a population-based sample of 2,652 RCCS  
 205 participants. Following extensive previous characterization of the study population (2, 6, 7), the model in section  
 206 S2.1 was specified in terms of strata  $a$  that were a combination of gender (male, female), age bracket (15-24, 25-34,  
 207 35-50 years), migration status (in-migration in 2 years before first RCCS visit in study period, resident otherwise),  
 208 and community type (agrarian, trading, fishing). This detailed description was chosen to accommodate variation in  
 209 participation and sequence sampling rates in the cohort.

210  
 211 **Modelling variation in participation rates**

212 Figure S6 illustrates participation rates (#participants/#eligible) by migration status, gender, and age bracket. Results  
 213 for each community are represented as a point. There were significant overall differences in participation rates by  
 214 gender and age, with variation across RCCS communities. The differences were described in a Bayesian Beta-  
 215 Binomial logistic regression model including all interaction terms between gender, age bracket, and migration status,

$$\begin{aligned} k_i^{par} &\sim \text{BetaBinomial}(\xi_i^{par}, n_i^{eli}, \phi) \\ \text{logit}(\xi_i^{par}) &= \beta_0 + \beta_1 F_i + \beta_2 G_i A_{1i} M_i + \beta_3 G_i A_{2i} M_i + \beta_4 G_i M_i + \\ &\quad \beta_5 (1 - G_i) A_{1i} M_i + \beta_6 (1 - G_i) A_{2i} M_i + \beta_7 (1 - G_i) M_i + \\ &\quad \beta_8 G_i A_{1i} (1 - M_i) + \beta_9 G_i A_{2i} (1 - M_i) + \beta_{10} G_i (1 - M_i) + \\ &\quad \beta_{11} (1 - G_i) A_{1i} (1 - M_i) + \beta_{12} (1 - G_i) A_{2i} (1 - M_i) \\ \beta_0 &\sim \text{Normal}(0, 100) \end{aligned}$$

223  $\beta_j \sim \text{Normal}(0,10)$  for  $j = 1, \dots, 12$

222 with data

$k_i^{par}$  RCCS participants in stratum  $i$   
 $n_i^{eli}$  census eligible individuals in stratum  $i$   
 $G_i$  gender status in stratum  $i$  (male=1, female=0)  
 $F_i$  fishing community status in stratum  $i$  (yes=1, no=0)  
 $T_i$  trading community status in stratum  $i$  (yes=1, no=0)  
 $M_i$  immigration status in stratum  $i$  (yes=1, no=0)  
 $A_{1i}$  age bracket 15-24 years in stratum  $i$  (yes=1, no=0)  
 $A_{2i}$  age bracket 25-34 years in stratum  $i$  (yes=1, no=0)

224

225 and estimated parameters

$\xi_i^{par}$  participation probability in stratum  $i$   
 $\phi$  overdispersion parameter  
 $\beta_j$  fixed effects regression parameters,  $j = 0, \dots, 12$ .

226

227 Similar versions of the model with different interaction terms were fitted with Stan version 2.19 (8), and the final  
228 version reported above was chosen based on best WAIC. The fixed effects parameters  $\beta_0, \beta_5, \beta_8, \beta_9, \beta_{10}, \beta_{11}, \beta_{12}$   
229 had marginal posterior distributions with 95% credibility intervals excluding zero. Monte Carlo samples of the  
230 marginal posterior distributions of  $\xi_i^{par}$  were used for sampling adjusted source attribution as described below.

231

### 232 **Modelling variation in sequence sampling rates**

233 Figure S7 illustrates sequence sampling rates (#sequenced at minimum quality criteria/#infected and not reporting  
234 ART use) by migration status, gender, and age bracket. Results for each community are represented as a point.  
235 There were significant overall differences in participation rates by gender and age, with variation across RCCS  
236 communities. The differences were described in a Bayesian Binomial logistic regression model of the form

$$\begin{aligned} 237 \quad k_i^{seq} &\sim \text{Binomial}(\xi_i^{seq}, n_i^{noARTuse}) \\ 238 \quad \text{logit}(\xi_i^{par}) &= \beta_0 + \beta_1 G_i + \beta_2 F_i + \beta_3 T_i + \beta_4 M_i + \\ 239 \quad &\quad \beta_5 A_{1i} + \beta_6 A_{2i} \\ 240 \quad \beta_0 &\sim \text{Normal}(0,100) \\ 241 \quad \beta_j &\sim \text{Normal}(0,10) \text{ for } j = 1, \dots, 6 \end{aligned}$$

242 with data and estimated parameters

$k_i^{seq}$  individuals of whom virus was deep-sequenced at minimum quality criteria in  
stratum  $i$   
 $n_i^{noARTuse}$  infected individuals who did not report ART use in stratum  $i$   
 $\xi_i^{seq}$  sequencing probability in stratum  $i$

243

244 and all other variables defined as for the participation rate analysis. Similar versions of the model were fitted with  
245 Stan version 2.19 (8). The final version reported above was chosen based on best WAIC. Models with  
246 overdispersion and/or interaction terms had worse WAIC values. The fixed effects parameters  $\beta_0, \beta_1, \beta_2, \beta_3, \beta_4, \beta_5,$   
247  $\beta_5$  had marginal posterior distributions with 95% credibility intervals excluding zero. Monte Carlo samples of the  
248 marginal posterior distributions of  $\xi_i^{seq}$  were used for sampling adjusted source attribution as described below.

249

### 250 **Specification of the sampling variable**

251 For stratum  $a$ , overall sampling was modelled as the product of study participation and, subsequently, sequencing if  
252 participants were infected,  $p(\xi_a) = p(\xi_a^{par})p(\xi_a^{seq})$ , where  $p(\xi_a^{par})$  is the marginal posterior distribution of  
253 participation rates under the above Beta-Binomial-logistic model, and  $p(\xi_a^{seq})$  is the marginal posterior distribution  
254 of sequencing rates under the above Binomial-logistic model. To fit the Bayesian data augmentation model of  
255 section S2.1, Monte Carlo samples from  $p(\xi_a)$  are required. These were obtained by drawing Monte Carlo samples  
256 from  $p(\xi_a^{par})$  and  $p(\xi_a^{seq})$  that were obtained with Stan, and multiplying both samples.

257

### 258 **Computational inference**

259 To adjust for sampling differences by gender, age, migration status, and community type, we extended the flow  
 260 vector  $\boldsymbol{\pi}$  of size  $L = 6$  to account for a finer stratification of the population by sampling groups. Based on our  
 261 stratification by gender, age bracket, migration status, and community type, the resulting flow vector  $\boldsymbol{\pi}$  had length  
 262  $L = 576$ , and captured, for example, the proportion of transmissions from resident men aged 25-29 in inland  
 263 communities to resident women aged 15-24 in inland communities. Most entries in the observation vector  
 264  $\mathbf{n} = (n_{ab})$  were zero. However because of incomplete sampling, the corresponding (unobserved) actual  
 265 transmission counts  $z_{ab}$  were often non-zero, and under the model of section S2.1 the probabilities that the actual  
 266 (unobserved) transmission counts were non-zero differed for each entry of  $\mathbf{z} = (z_{ab})$  because the sampling  
 267 probabilities  $\xi_a$  and  $\xi_b$  differed in each case. The joint posterior distribution  $p(\boldsymbol{\pi}, \mathbf{z}, \mathbf{Z}, \boldsymbol{\xi} | \mathbf{n})$  was numerically  
 268 estimated with the MCMC algorithm in Section S2.1 in 4.8 million MCMC iterations. Figure S8 reports traceplots  
 269 of the primary parameter of interest,  $\boldsymbol{\pi}$ . Convergence was assessed with the Gelman-Rubin statistic, and mixing was  
 270 assessed in terms of effective sample size, as calculated with the coda R package version 0.19-2. Numerical  
 271 convergence was achieved in a burn-in period of 240e3 iterations, and the effective sample sizes from the marginal  
 272 posterior densities were all above 10,000, confirming that inference of  $\boldsymbol{\pi}$  on the Rakai data set was computationally  
 273 feasible.

274  
 275 **Reported quantities**

276 To characterize transmission dynamics between inland and fishing RCCS communities, the following quantities  
 277 were derived as summary measures from MCMC output:

| <i>quantity</i>                                                      | <i>symbol</i>                                                                                                                                                                                                                                                              | <i>definition</i>                                                                                                                                                                                                                                                                                                                        |
|----------------------------------------------------------------------|----------------------------------------------------------------------------------------------------------------------------------------------------------------------------------------------------------------------------------------------------------------------------|------------------------------------------------------------------------------------------------------------------------------------------------------------------------------------------------------------------------------------------------------------------------------------------------------------------------------------------|
| transmission flows<br>between inland and<br>fishing communities in % | $\pi_{FF}, \pi_{IF}, \pi_{FI}, \pi_{II}, \pi_{EI}, \pi_{EF}$ where<br>$F$ denotes fishing communities, $I$<br>inland communities, $E$ external<br>introductions through<br>immigration, with<br>$\pi_{FF} + \pi_{IF} + \pi_{FI} + \pi_{II} + \pi_{EI} +$<br>$\pi_{EF} = 1$ | $\pi_{FF} = \sum_{a \in F, b \in F} \pi_{ab}$ , where $\pi_{ab}$ is defined<br>above as the proportion of transmissions<br>from stratum $a$ to stratum $b$ ; i.e. MCMC<br>output was aggregated across strata in fishing<br>communities. Calculations for $\pi_{IF}, \pi_{FI}, \pi_{II},$<br>$\pi_{EI}, \pi_{EF}$ were done analogously. |
| transmission flow ratio                                              | $\gamma$                                                                                                                                                                                                                                                                   | $\gamma = \pi_{IF} / \pi_{FI}$                                                                                                                                                                                                                                                                                                           |
| sources of infection in<br>fishing communities in %                  | $\delta_F^F, \delta_I^F, \delta_E^F$                                                                                                                                                                                                                                       | $\delta_F^F = \pi_{FF} / (\pi_{FF} + \pi_{IF} + \pi_{EF}),$<br>$\delta_I^F = \pi_{IF} / (\pi_{FF} + \pi_{IF} + \pi_{EF}),$<br>$\delta_E^F = \pi_{EF} / (\pi_{FF} + \pi_{IF} + \pi_{EF})$                                                                                                                                                 |
| sources of infection in<br>inland communities in %                   | $\delta_I^I, \delta_F^I, \delta_E^I$                                                                                                                                                                                                                                       | $\delta_I^I = \pi_{II} / (\pi_{II} + \pi_{FI} + \pi_{EI}),$<br>$\delta_F^I = \pi_{FI} / (\pi_{II} + \pi_{FI} + \pi_{EI}),$<br>$\delta_E^I = \pi_{EI} / (\pi_{II} + \pi_{FI} + \pi_{EI})$                                                                                                                                                 |
| recipients of infection<br>from fishing communities<br>in %          | $\omega_F^F, \omega_I^F$                                                                                                                                                                                                                                                   | $\omega_F^F = \pi_{FF} / (\pi_{FF} + \pi_{FI}),$<br>$\omega_I^F = \pi_{FI} / (\pi_{FF} + \pi_{FI})$                                                                                                                                                                                                                                      |
| recipients of infection<br>from inland communities<br>in %           | $\omega_F^I, \omega_I^I$                                                                                                                                                                                                                                                   | $\omega_F^I = \pi_{FF} / (\pi_{IF} + \pi_{II}),$<br>$\omega_I^I = \pi_{IF} / (\pi_{IF} + \pi_{II})$                                                                                                                                                                                                                                      |
| recipients of infection<br>from immigration in %                     | $\omega_F^E, \omega_I^E$                                                                                                                                                                                                                                                   | $\omega_F^E = \pi_{EF} / (\pi_{EF} + \pi_{EI}),$<br>$\omega_I^E = \pi_{EI} / (\pi_{EF} + \pi_{EI})$                                                                                                                                                                                                                                      |

278  
 279 Reported error bars are 95% highest posterior density intervals of the marginal posterior densities of the above  
 280 variables. Estimates stratified by inland and fishing RCCS communities and gender were calculated analogously.  
 281 Table 1 reports estimated transmission flows between fishing and inland communities. Figure 3 reports the  
 282 estimated transmission flow ratio. Table S2 reports estimated sources of infection in fishing communities and in  
 283 inland communities. Table S3 reports estimated recipients of infection in fishing communities and in inland  
 284 communities.

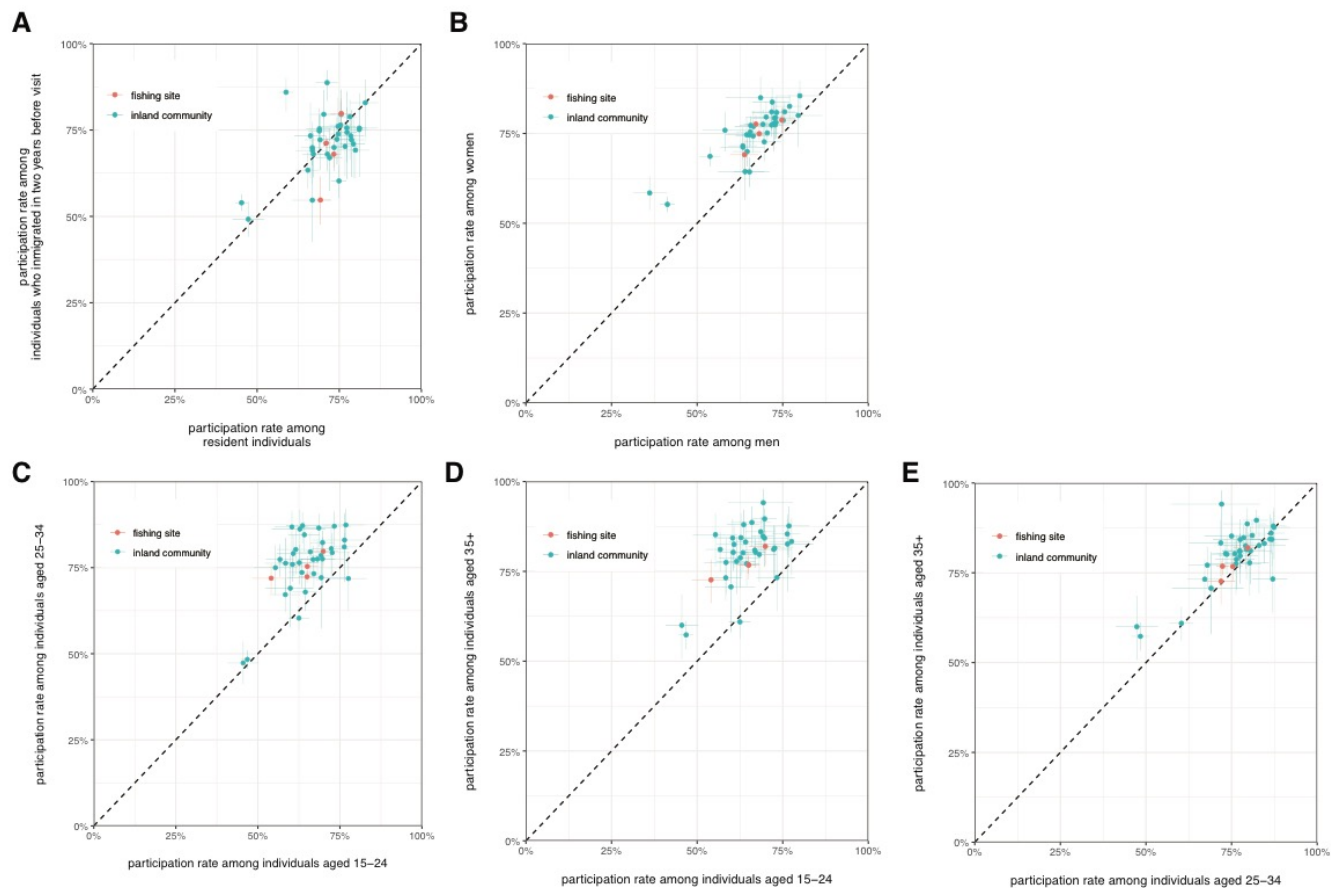

287 **Figure S6. Participation rates by gender, age, and migration status.** RCCS participation rates were defined as  
288 the number of participants divided by the number of census eligible individuals for given population strata in each  
289 RCCS community. 95% Agresti-Coull confidence intervals were calculated. The subfigures compare community-  
290 specific participation rates between two strata, (A) migration status, (B) gender, (C-E) age brackets. The diagonal  
291 line indicates no community-specific differences in participation rates for the two strata compared.  
292



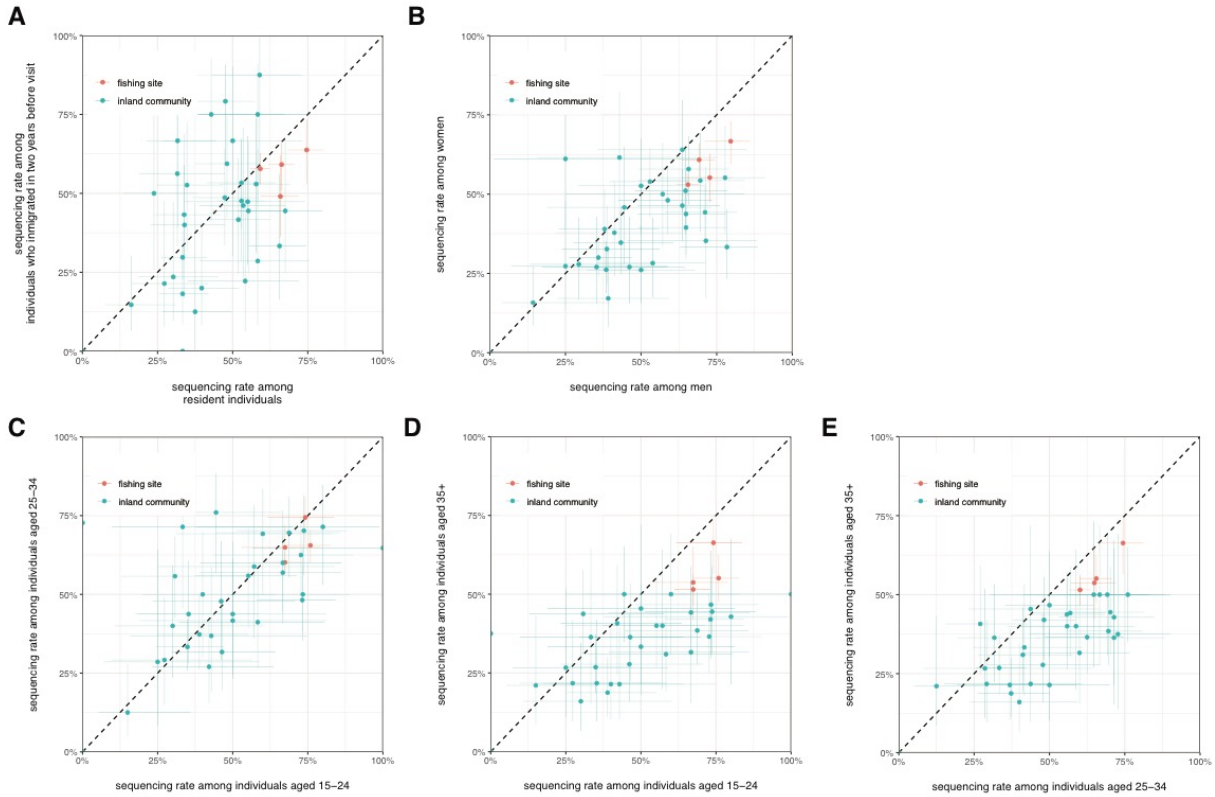

293  
 294 **Figure S7. Sequence sampling rates by gender, age, and migration status.** RCCS sequence sampling rates were  
 295 defined as the number of individuals of whom virus was deep-sequenced at minimum quality criteria divided by the  
 296 number of infected individuals who did not report ART use for given population strata in each RCCS community.  
 297 95% Agresti-Coull confidence intervals were calculated. The subfigures compare community-specific participation  
 298 rates between two strata, (A) migration status, (B) gender, (C-E) age brackets. The diagonal line indicates no  
 299 community-specific differences in sequence sampling rates for the two strata compared.  
 300

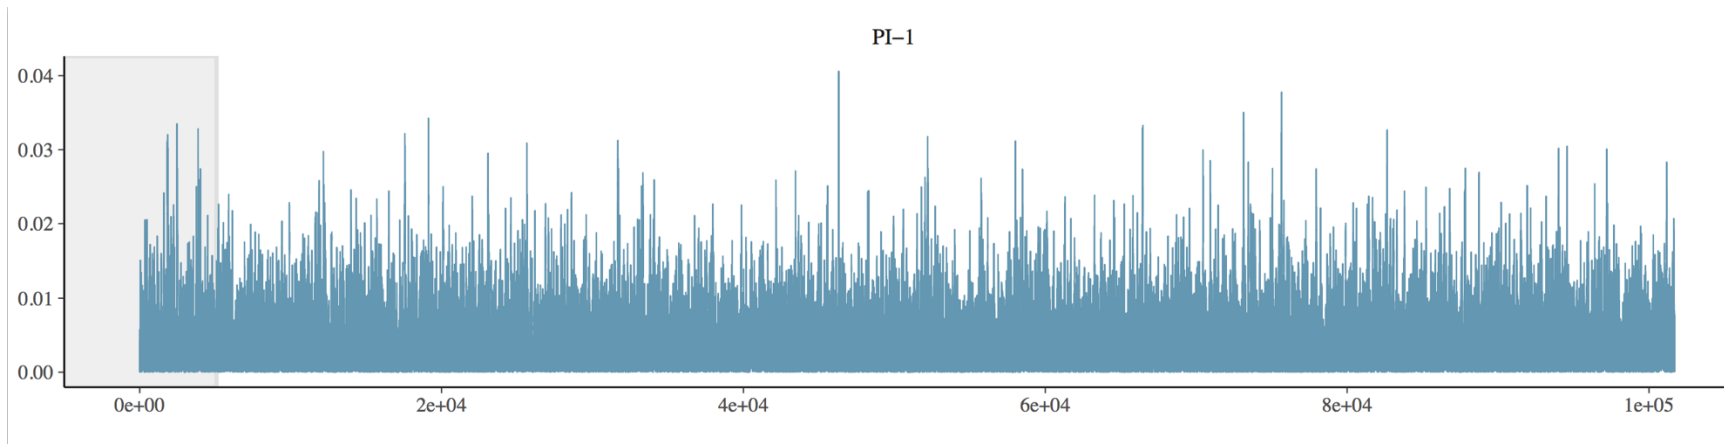

301  
 302 **Figure S8. Numerical performance: traceplots for estimated proportions of transmission flows between RCCS communities.** Parameter states for the first  
 303 dimension of the target parameter  $\pi$  (proportions of transmission flows) from the first to the last full Markov Chain Monte Carlo cycle over all unknown  
 304 parameters. The MCMC algorithm was run for 100,000 cycles, corresponding to 4.8 million MCMC iterations, of which the first 5% were discarded as burn-in.  
 305 The traceplot indicates fast numerical convergence to the posterior distribution and good mixing on the posterior distribution.

306 **Supplementary Text S3 Prediction of transmission flows between lakeside fishing and**  
 307 **inland populations**

308

309 **Overview**

310 The RCCS is not a proportionate sample of the underlying population in the Rakai region, chiefly because the RCCS  
 311 oversamples Lake Victoria fishing communities. This means that estimated transmission flows between the  
 312 communities within the cohort do not scale to the total population. We predicted the transmission flows  
 313  $\boldsymbol{\pi}^* = (\pi_{FF}^*, \pi_{IF}^*, \pi_{FI}^*, \pi_{II}^*)$  between the inland and fishing areas defined in Figure 1A. The predictions were based on  
 314 the estimated transmission flows between RCCS communities, and scaled by the total population in inland and  
 315 fishing areas.

316

317 **Input data**

318 The predictions required spatial estimates of the number of men and women in inland and fishing areas. High  
 319 resolution estimates of population density on a 1km<sup>2</sup> spatial grid were from the World Pop Project, aggregated  
 320 within inland and fishing areas by gender, and are reported in Supplementary Table S4 (7, 9). The population count  
 321 in fishing areas was lower than the census-eligible population in the four fishing communities of the RCCS,  
 322 suggesting underestimation of the population in the lakeside area by a factor of at least 1.78. We multiplied the  
 323 World Pop estimate of the population size in the lakeside area by a factor of 2. Sensitivity analyses using alternative  
 324 approaches did not substantially impact on our results as described in Supplementary Text S4. Population counts in  
 325 the inland area agreed with estimates from the Ugandan Bureau of Statistics, and were left unchanged. For the  
 326 predictions, we used the proportions  $\zeta_I$  and  $\zeta_F$  of individuals in inland and lakeside areas that are part of the RCCS  
 327 survey.

328

329 **Prediction of area-level transmission flows**

330 Predictions were based on the posterior predictive distribution

331 
$$p(\boldsymbol{\pi}^* | \mathbf{n}) = \int p(\boldsymbol{\pi}^* | \boldsymbol{\pi}, \mathbf{z}, Z, \boldsymbol{\xi}) p(\boldsymbol{\pi}, \mathbf{z}, Z, \boldsymbol{\xi} | \mathbf{n}) d\boldsymbol{\pi}, \mathbf{z}, Z, \boldsymbol{\xi}$$

332 where  $p(\boldsymbol{\pi}, \mathbf{z}, Z, \boldsymbol{\xi} | \mathbf{n})$  is the joint posterior distribution of the parameters of the Rakai source attribution model in  
 333 section S2.2, with strata collapsed to gender and area type. The vector of RCCS transmission flows was thus  
 334 (inland:M -> inland:F, inland:M -> lakeside:F, inland:F -> inland:M, inland:F -> lakeside:M, lakeside:M ->  
 335 lakeside:F, lakeside:M -> inland:F, lakeside:F -> lakeside:M, lakeside:F -> inland:M), of length  $L^* = 8$ . The  
 336 estimated transmission flows between RCCS inland and fishing communities were then adjusted by the number of  
 337 individuals under surveillance in the same manner as for sequence sampling in section S2.1, through the density  
 338

339 
$$p(\boldsymbol{\pi}^* | \boldsymbol{\pi}, \mathbf{z}, Z, \boldsymbol{\xi}) = \int p(\boldsymbol{\pi}^*, \mathbf{z}^*, Z^*, \boldsymbol{\zeta} | \boldsymbol{\pi}, \mathbf{z}, Z) d\boldsymbol{\pi}^*, \mathbf{z}^*, Z^*, \boldsymbol{\zeta}$$

340

341 where

342

343 
$$p(\boldsymbol{\pi}^*, \mathbf{z}^*, Z^*, \boldsymbol{\zeta} | \boldsymbol{\pi}, \mathbf{z}, Z) \propto \prod_{x,y} \text{Binomial}(z_{xy}; z_{xy}^*, \zeta_x \zeta_y) \times \text{Multinomial}(\mathbf{z}^*; Z^*, \boldsymbol{\pi}^*) \times$$
  
 344 
$$p(\boldsymbol{\pi}^*) p(Z^*) p(\boldsymbol{\zeta}).$$

345

346 The prior density for survey inclusion  $\zeta_x$  in area  $x$  was set to the Beta distribution with parameters  $\alpha_x$  set to the  
 347 number of individuals surveyed in area  $x$  plus one, and  $\beta_x$  set to the number of individuals not surveyed in area  $x$   
 348 plus one. The prior density on the total number of transmission in inland and fishing areas,  $p(Z^*)$ , was set to a  
 349 shifted Poisson distribution with mean  $Z/\bar{\pi}$ . The prior density for the area-level transmission flows,  $p(\boldsymbol{\pi}^*)$ , was set  
 350 to the Dirichlet distribution with parameters  $0.8/L^*$ .

351

352 **Computational inference**

353 Numerical estimation of the posterior predictive density of  $\boldsymbol{\pi}^*$  was straightforward due to the low dimensionality of  
 354 the parameter space ( $L^* = 8$ ). First, 10,000 Monte Carlo samples were drawn from  $p(\boldsymbol{\pi}, \mathbf{z}, Z, \boldsymbol{\xi} | \mathbf{n})$ . Second, for each  
 355 Monte Carlo sample, 100 samples from  $p(\boldsymbol{\pi}^*, \mathbf{z}^*, Z^*, \boldsymbol{\zeta} | \boldsymbol{\pi}_i, \mathbf{z}_i, Z_i)$  were generated using the same MCMC algorithm  
 356 as in section S2.1. Numerical convergence was assessed with the Gelman-Rubin statistic, and was achieved in a

357 burn-in period of 90 iterations. Third, the 10 last MCMC iterations were retained, and merged across all 10,000  
358 samples from  $p(\boldsymbol{\pi}, \mathbf{z}, Z, \boldsymbol{\xi} | \mathbf{n})$ . Figure S9 reports traceplots of  $\boldsymbol{\pi}^*$ , and traceplots for the other variables were similar.  
359 Effective sample sizes were calculated as described in Supplementary Text S2, and the smallest effective sample  
360 size was above 10,000, indicating good numerical performance.

361

362 **Reported quantities**

363 Analogous to the reported quantities described in section S2.2.

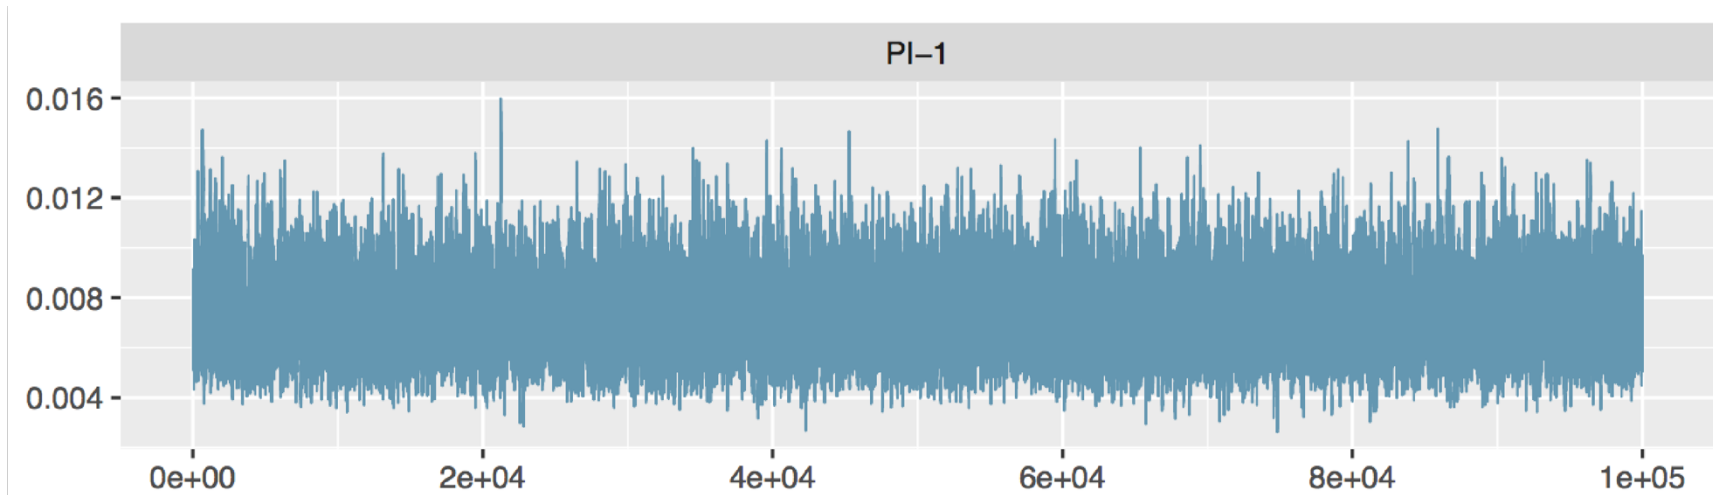

364  
 365 **Figure S9. Numerical performance: traceplots for predicted proportions of transmission flows** between inland and fishing sub-districts. Parameter states for  
 366 the first component of  $\boldsymbol{\pi}^*$  (predicted proportions of transmission flows). First, 10,000 Monte Carlo samples were drawn from  $p(\boldsymbol{\pi}, \mathbf{z}, Z, \boldsymbol{\xi}|\mathbf{n})$  described in  
 367 Supplementary Text S3. Second, for each Monte Carlo sample, 100 samples from  $p(\boldsymbol{\pi}^*, \mathbf{z}^*, Z^*, \boldsymbol{\zeta}|\boldsymbol{\pi}_i, \mathbf{z}_i, Z_i)$  were generated using the same MCMC algorithm as  
 368 in Supplementary Text S2, section S2.1. Third, the 10 last MCMC iterations were retained in each case, and merged across all 10,000 samples from  
 369  $p(\boldsymbol{\pi}, \mathbf{z}, Z, \boldsymbol{\xi}|\mathbf{n})$ , to obtain 100,000 samples from  $p(\boldsymbol{\pi}^*|\mathbf{n})$ . The traceplot indicates good sampling of the posterior distribution.

370 **Supplementary Text S4 Sensitivity Analyses**

371

372 **Impact of quality criteria on deep-sequence depth used to select virus from individuals for phylogenetic**  
373 **analysis**

374 Deep-sequencing was attempted from viral samples of nearly all participant who self-reported to be ART naïve;  
375 however the quality of deep-sequencing output was moderate. For the main analysis, participants were included if  
376 they had virus deep-sequenced with viral sequence fragments of at least 250bp that covered the HIV genome at a  
377 depth of 30 copies (30X) for at least 750nt of the viral genome. In sensitivity analyses, these inclusion criteria were  
378 relaxed and tightened as follows:

379

| <b>Analysis</b>  | <b>Description</b>                                                                                                                                                                                                               |
|------------------|----------------------------------------------------------------------------------------------------------------------------------------------------------------------------------------------------------------------------------|
| 10X              | Include participants in phylogenetic analysis if they had virus deep-sequenced with viral sequence fragments of at least 250bp that covered the HIV genome at a depth of 10 copies (10X) for at least 750nt of the viral genome. |
| 20X              | Include participants in phylogenetic analysis if they had virus deep-sequenced with viral sequence fragments of at least 250bp that covered the HIV genome at a depth of 20 copies (20X) for at least 750nt of the viral genome. |
| 30X<br>(central) | Include participants in phylogenetic analysis if they had virus deep-sequenced with viral sequence fragments of at least 250bp that covered the HIV genome at a depth of 30 copies (30X) for at least 750nt of the viral genome. |
| 50X              | Include participants in phylogenetic analysis if they had virus deep-sequenced with viral sequence fragments of at least 250bp that covered the HIV genome at a depth of 50 copies (50X) for at least 750nt of the viral genome. |

380

381 Figure S10 shows the impact of these criteria on estimated transmission flows among RCCS communities by  
382 gender. Figure S11 illustrates the impact of these criteria on the transmission flow ratio from inland to fishing  
383 communities rather than vice versa overall. The interquartile range of the estimated transmission flow ratio was  
384 clearly >1 at stronger quality criteria (20X to 50X), but not in the 10X analysis.

385

386 **Impact of stringency criteria on the proportion of deep-sequence phylogenies that are supporting linkage and**  
387 **transmission in one particular direction**

388 Using phyloscanner, many deep-sequence phylogenies were reconstructed for each pair of individuals, and  
389 phylogenetic inferences are based on the frequency of phylogenetic relationships seen in this set of deep-sequence  
390 phylogenies. For the main analysis, a pair of sequenced participants was classified as a source-recipient pair and  
391 used for estimating transmission flows if at least 60% of deep-sequence phylogenies supported virus transmission,  
392 and if at least 60% of these phylogenies supported one direction of transmission. The error rate in phylogenetic  
393 inference of the direction of transmission based on this criterion was estimated to be within 10-20%. In sensitivity  
394 analyses, the threshold was varied as follows:

395

| <b>Analysis</b>  | <b>Description</b>                                                                                                                                                                                                                                                                 |
|------------------|------------------------------------------------------------------------------------------------------------------------------------------------------------------------------------------------------------------------------------------------------------------------------------|
| 50%              | A pair of sequenced participants was classified as a source-recipient pair and used for estimating transmission flows if at least 50% of deep-sequence phylogenies supported virus transmission, and if at least 50% of these phylogenies supported one direction of transmission. |
| 55%              | A pair of sequenced participants was classified as a source-recipient pair and used for estimating transmission flows if at least 55% of deep-sequence phylogenies supported virus transmission, and if at least 55% of these phylogenies supported one direction of transmission. |
| 60%<br>(central) | A pair of sequenced participants was classified as a source-recipient pair and used for estimating transmission flows if at least 60% of deep-sequence phylogenies supported virus transmission, and if at least 60% of these phylogenies supported one direction of transmission. |
| 65%              | A pair of sequenced participants was classified as a source-recipient pair and used for estimating transmission flows if at least 65% of deep-sequence phylogenies supported virus transmission, and if at least 65% of these phylogenies supported one direction of transmission. |
| 70%              | A pair of sequenced participants was classified as a source-recipient pair and used for estimating transmission flows if at least 70% of deep-sequence phylogenies supported virus transmission, and if at least 70% of these phylogenies supported one direction of transmission. |

396  
 397 Figure S12 shows the impact of these criteria on estimated transmission flows among RCCS communities by  
 398 gender. Figure S13 illustrates the impact of these criteria on the transmission flow ratio from inland to fishing  
 399 communities rather than vice versa overall. The width of the 95% credibility intervals increased as selection criteria  
 400 were stricter, and the interquartile range of the estimated transmission flow ratio was clearly >1 in all cases.

401  
 402 **Impact of classification of phylogenetically likely transmitters into residents and in-migrants**

403 To interpret phylogenetically reconstructed source-recipient pairs, we used data on current residence (geo-location  
 404 of current household) and in-migration (date and origin of in-migration). The geo-location of each phylogenetically  
 405 likely recipient partner was set to the community in which the recipient was found to be infected. For the main  
 406 analysis, the location of the phylogenetically likely transmitter was set to the community of residence at or shortly  
 407 before the recipient was identified as HIV-positive. If the source partner had migrated within the two prior years, the  
 408 location was set as the community prior to migration. In sensitivity analyses, the timespan used to classify the source  
 409 partner as a recent in-migrant was varied as follows:

410

| <b>Analysis</b>        | <b>Description</b>                                                                                                       |
|------------------------|--------------------------------------------------------------------------------------------------------------------------|
| 6 months               | If the source partner had migrated within the 6 prior months, the location was set as the community prior to migration.  |
| 12 months              | If the source partner had migrated within the 12 prior months, the location was set as the community prior to migration. |
| 24 months<br>(central) | If the source partner had migrated within the 24 prior months, the location was set as the community prior to migration. |
| 36 months              | If the source partner had migrated within the 36 prior months, the location was set as the community prior to migration. |
| 48 months              | If the source partner had migrated within the 48 prior months, the location was set as the community prior to migration. |

411  
 412 Figure S14 shows the impact of these criteria on estimated transmission flows among RCCS communities by  
 413 gender. Figure S15 illustrates the impact of these criteria on the transmission flow ratio from inland to fishing  
 414 communities rather than vice versa overall. The interquartile range of the estimated transmission flow ratio was  
 415 clearly >1 in all sensitivity analyses.

416  
 417 **Impact of unknown origins of migration**

418 There were 5 phylogenetically likely transmitters who had in-migrated in the two years prior to diagnosis of the  
 419 likely recipient, and for whom the origin of migration could not be identified. For the main analysis, the source  
 420 location was set to fishing communities in order to obtain a conservative estimate of transmission flows that is  
 421 biased towards transmissions from fishing communities. In a sensitivity analysis, the source location of these likely  
 422 transmitters was set to inland communities:

423

| <b>Analysis</b>                  | <b>Description</b>                                                                                                         |
|----------------------------------|----------------------------------------------------------------------------------------------------------------------------|
| Inland communities               | Source location of 5 phylogenetically likely transmitters with unknown origin of migration was set to inland communities.  |
| Fishing communities<br>(central) | Source location of 5 phylogenetically likely transmitters with unknown origin of migration was set to fishing communities. |

424  
 425 Figure S16 shows the impact of these criteria on estimated transmission flows among RCCS communities by  
 426 gender. Figure S17 illustrates the impact of these criteria on the transmission flow ratio from inland to fishing  
 427 communities rather than vice versa overall. The interquartile range of the estimated overall transmission flow ratio  
 428 was clearly >1 in all sensitivity analyses.

429  
 430 **Impact of sampling adjustments**

431 Viral phylogenetic estimates of transmission flows are derived from reconstructed viral phylogenies, which in turn  
 432 depend on who is sampled. For the main analysis, we adjusted crude estimates by variation in the proportion of  
 433 census-eligible individuals who participated, by variation in the proportion of infected participants not reporting  
 434 ART use at first visit who were deep-sequenced at minimum quality criteria, and by variation in the proportion of

435 infected participants who were deep-sequenced at minimum quality criteria. In sensitivity analyses, we varied these  
 436 adjustments as follows:  
 437

| <b>Analysis</b>       | <b>Description</b>                                                                                                                                                                                                            |
|-----------------------|-------------------------------------------------------------------------------------------------------------------------------------------------------------------------------------------------------------------------------|
| P:0, S:0              | No adjustments for variation in participation probability, and no adjustments for variation in deep-sequencing probability.                                                                                                   |
| P:1, S:0              | With adjustments for variation in participation probability, and no adjustments for variation in deep-sequencing probability.                                                                                                 |
| P:0, S:1              | No adjustments for variation in participation probability, and with adjustments for variation in the proportion of sequenced individuals among individuals who did not report ART use at their first visit.                   |
| P:1, S:1<br>(central) | With adjustments for variation in participation probability, and with adjustments for variation in the proportion of sequenced individuals among individuals who did not report ART use at their first visit.                 |
| P:0, S:2              | No adjustments for variation in participation probability, and with adjustments for variation in the proportion of sequenced individuals among infected individuals including those reporting ART use at their first visit.   |
| P:1, S:2              | With adjustments for variation in participation probability, and with adjustments for variation in the proportion of sequenced individuals among infected individuals including those reporting ART use at their first visit. |

438  
 439 Figure S18 shows the impact of these criteria on estimated transmission flows among RCCS communities by  
 440 gender. Figure S19 illustrates the impact of these criteria on the transmission flow ratio from inland to fishing  
 441 communities rather than vice versa overall. The interquartile range of the estimated transmission flow ratio was  
 442 clearly >1 in all sensitivity analyses.  
 443

#### 444 **Impact of population size estimates**

445 The statistical predictions of transmission flows between the lakeside and inland areas shown in Figure 1A were  
 446 based on the estimated transmission flows among RCCS communities and population size data on the lakeside and  
 447 inland areas (7, 9). For the main analysis, we used the 2015 WorldPop estimate of the total number of individuals  
 448 living in inland and fishing areas by gender reported in Supplementary Table S4, multiplied counts due to  
 449 underestimation by a factor of 2, and then divided the number of census-eligible individuals by these counts to obtain  
 450 estimates of the proportion of survey-eligible individuals in lakeside and fishing areas. This proportion was then  
 451 used to scale transmission flows within and between RCCS communities to lakeside and inland areas as described in  
 452 Supplementary Text S3. In sensitivity analyses, we varied the underestimation factor from 1 to 3. In addition, we  
 453 used estimates of the infected population in lakeside and inland areas to scale transmission flows, using a spatial  
 454 mapping approach that we previously reported (7). Briefly, spatial maps of infected men and women aged 15-49  
 455 years were generated on a 1km<sup>2</sup> high-resolution grid through a spatial binomial-logistic disease count model in Stan.  
 456 The estimated maps included data on (1) population density from the World Pop Project, (2) age structure from the  
 457 RCCS census conducted in 2015-2016, and (3) geo-referenced HIV prevalence data (15-49 years old) from the  
 458 RCCS shown in Supplementary Figure S1. The spatial estimates of infected men and women were then aggregated  
 459 within inland and fishing areas by gender, and are reported in Supplementary Table S4. The full set of sensitivity  
 460 analyses was as follows:  
 461

| <b>Analysis</b>   | <b>Description</b>                                                                                                                          |
|-------------------|---------------------------------------------------------------------------------------------------------------------------------------------|
| Prop all, 1X      | Scaling RCCS transmission flows by 1 times the WorldPop estimate of the total population size of men and women in inland and fishing areas. |
| Prop all, 2X      | Scaling RCCS transmission flows by 2 times the WorldPop estimate of the total population size of men and women in inland and fishing areas. |
| Prop all, 3X      | Scaling RCCS transmission flows by 3 times the WorldPop estimate of the total population size of men and women in inland and fishing areas. |
| Prop infected, 1X | Scaling RCCS transmission flows by 1 times the estimate of the number of HIV-infected men and women in inland and fishing areas.            |
| Prop infected, 2X | Scaling RCCS transmission flows by 2 times the estimate of the number of HIV-infected men and women in inland and fishing areas.            |



Prop infected, Scaling RCCS transmission flows by 3 times the estimate of the number of HIV-infected men  
3X and women in inland and fishing areas.

462  
463  
464  
465  
466  
467

Figure S20 shows the impact of these criteria on estimated transmission flows among RCCS communities by gender. Figure S21 illustrates the impact of these criteria on the transmission flow ratio from inland to fishing communities rather than vice versa overall. The interquartile range of the estimated transmission flow ratio was clearly >1 in all sensitivity analyses.

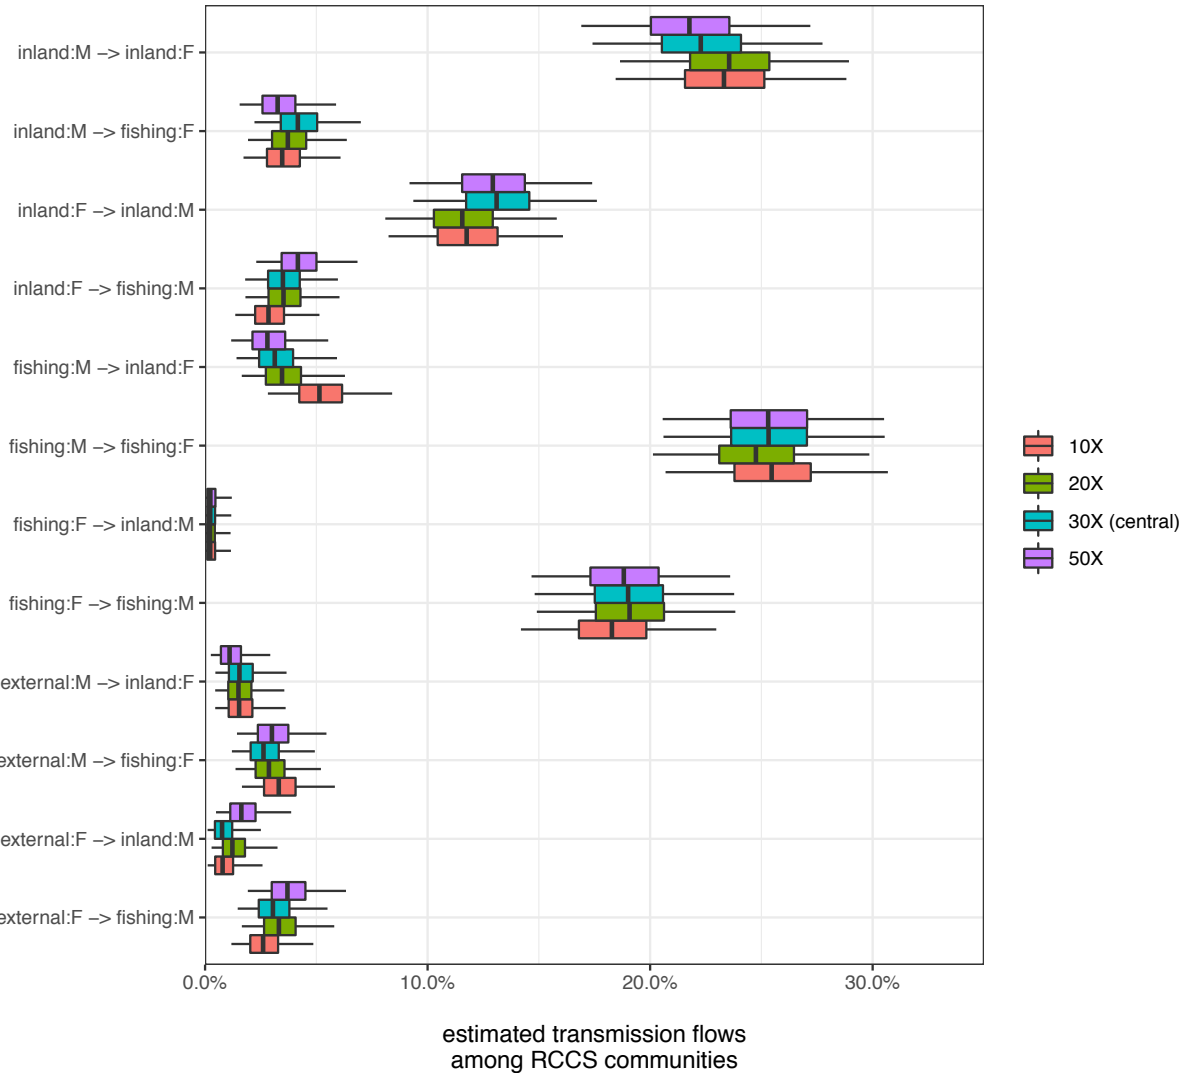

468  
469  
470

**Figure S10. Impact of quality criteria on deep-sequencing depth on estimated transmission flows.**

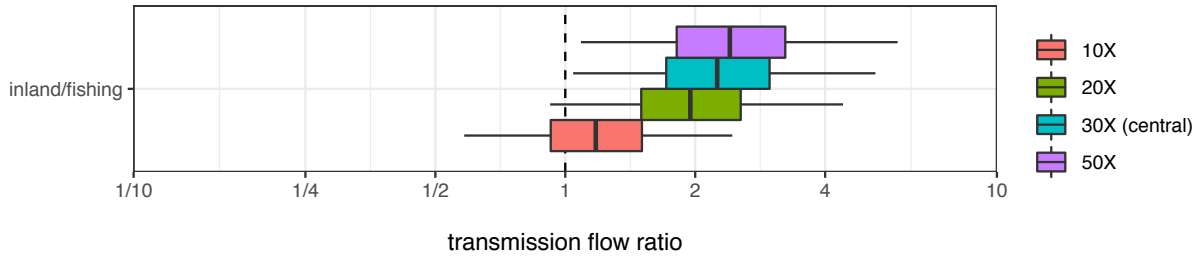

471  
 472 **Figure S11. Impact of quality criteria on deep-sequencing depth on the estimated transmission flow ratio**  
 473 **from inland communities to fishing communities rather than vice versa.**

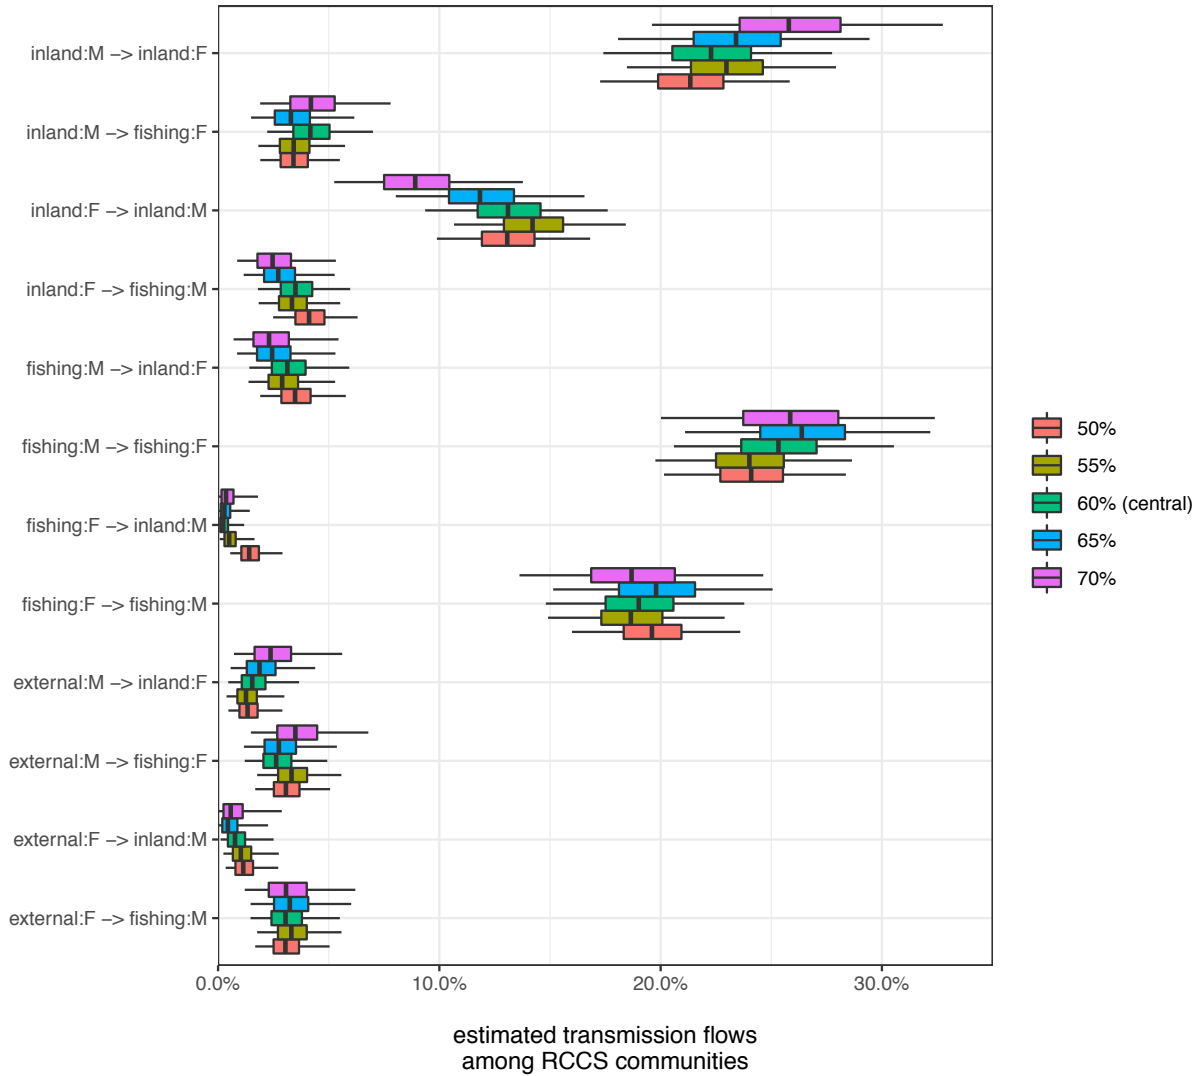

474  
 475 **Figure S12. Impact of stringency criteria on the proportion of deep-sequence phylogenies in support of**  
 476 **transmission and direction of transmission by gender on estimated transmission flows.**  
 477

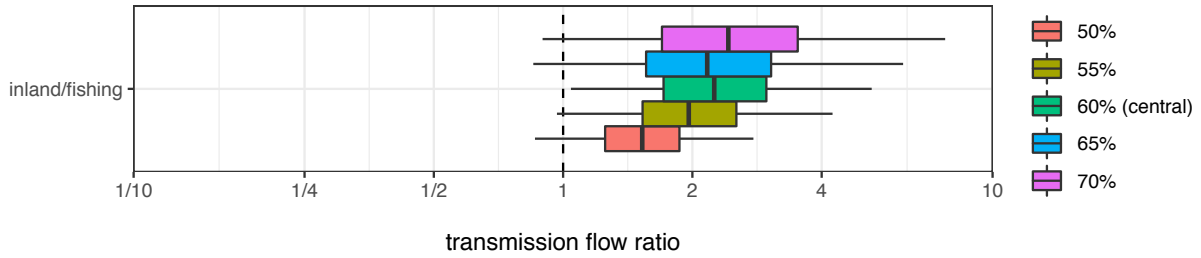

478  
 479 **Figure S13. Impact of stringency criteria on the proportion of deep-sequence phylogenies in support of**  
 480 **transmission and direction of transmission on the estimated transmission flow ratio from inland communities**  
 481 **to fishing communities rather than vice versa.**  
 482

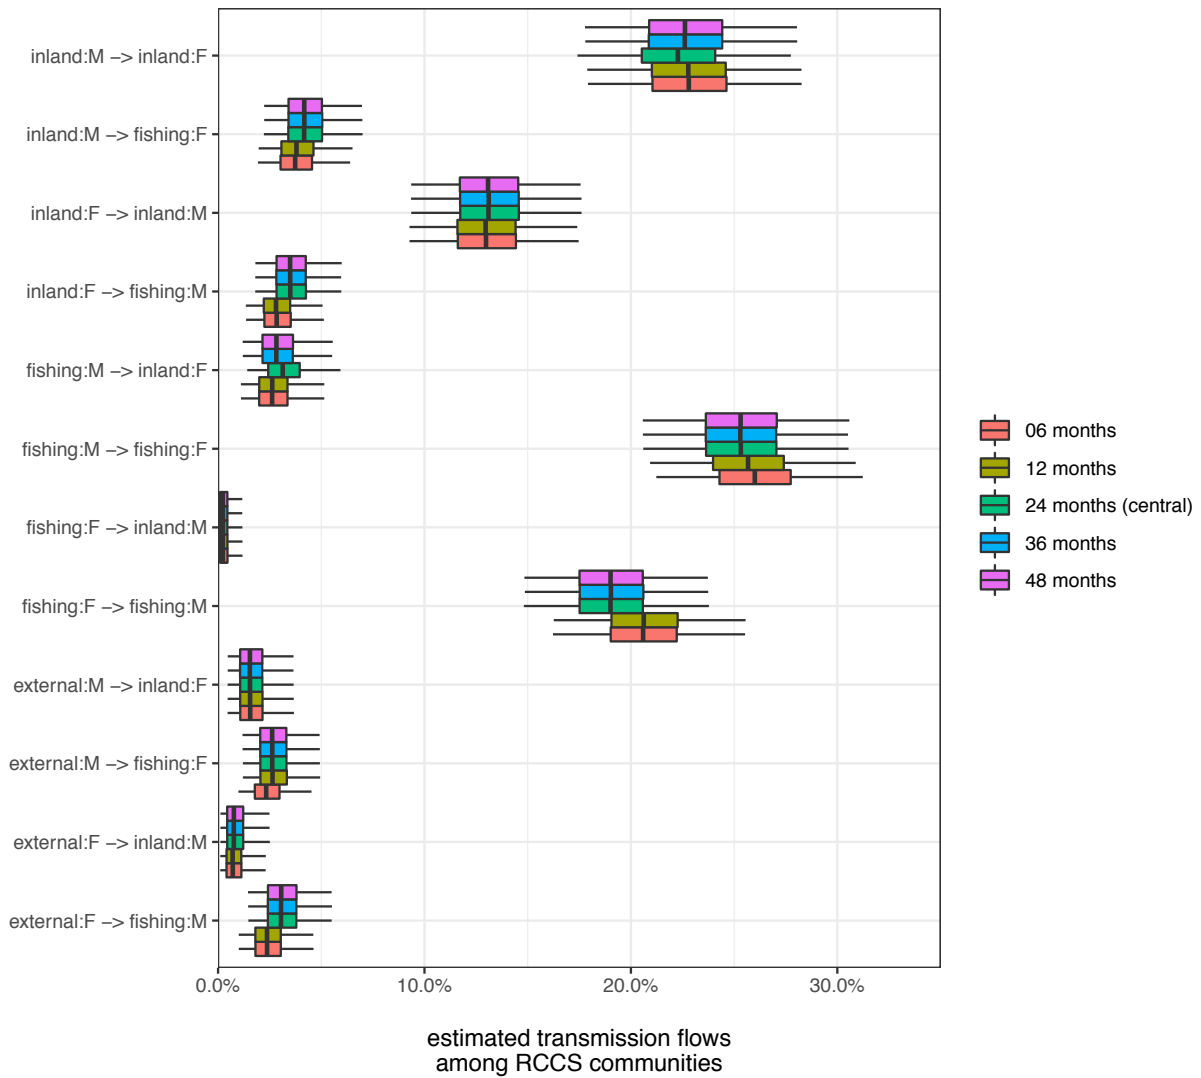

483  
 484 **Figure S14. Impact of the time span between in-migration events of likely transmitters and time of diagnosis**  
 485 **of likely recipients within which the source location is set to the origin of migration on estimated transmission**  
 486 **flows by gender.**  
 487

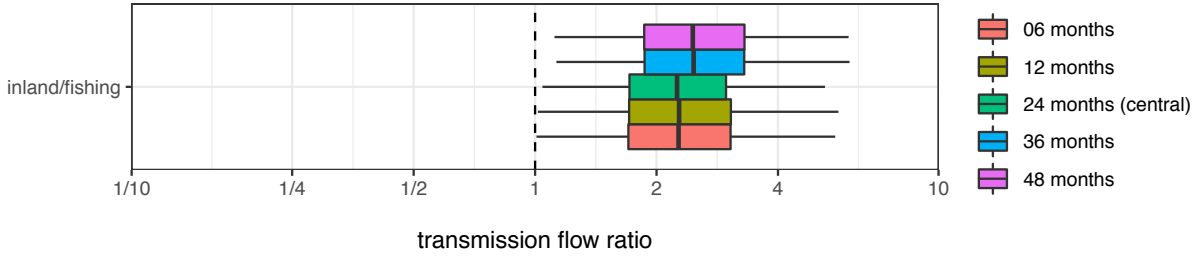

488  
 489 **Figure S14. Impact of the time span between in-migration events of likely transmitters and time of diagnosis**  
 490 **of likely recipients within which the source location is set to the origin of migration on the estimated**  
 491 **transmission flow ratio from inland communities to fishing communities rather than vice versa.**  
 492

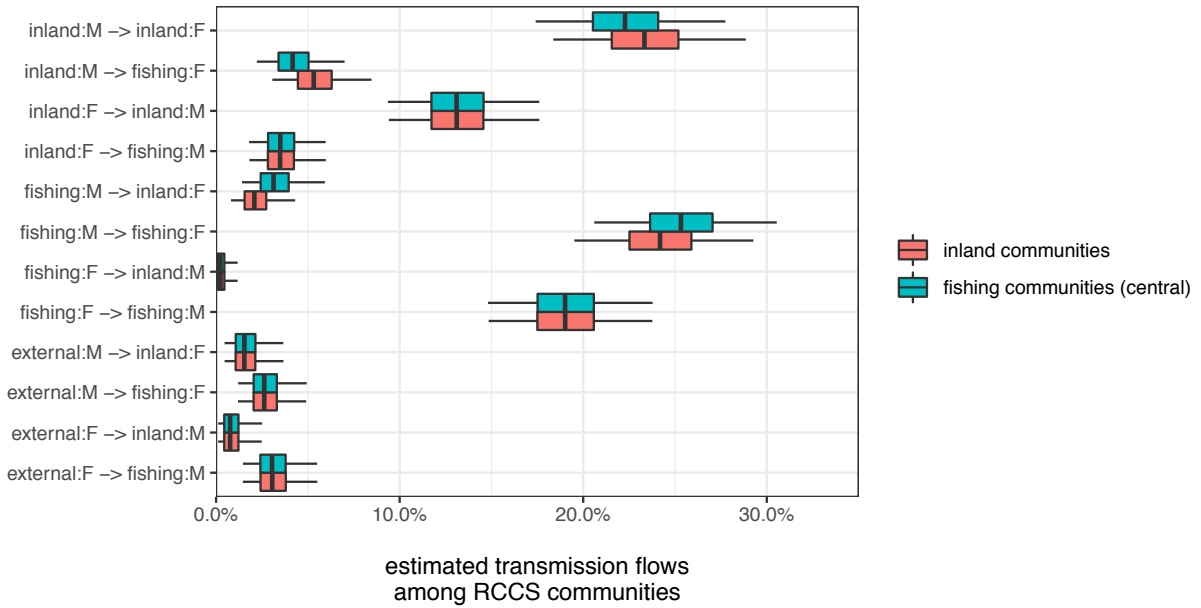

493  
 494 **Figure S16. Impact of attributing the source location of likely transmitters with unknown origin of migration**  
 495 **to inland or fishing communities on estimated transmission flows by gender.**  
 496

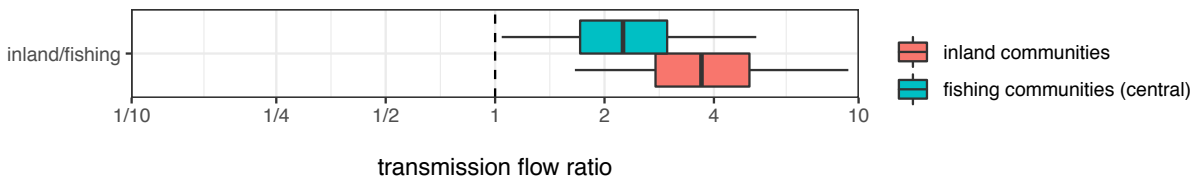

497  
 498 **Figure S17. Impact of attributing the source location of likely transmitters with unknown origin of migration**  
 499 **to inland or fishing communities on the estimated transmission flow ratio from inland communities to fishing**  
 500 **communities rather than vice versa.**

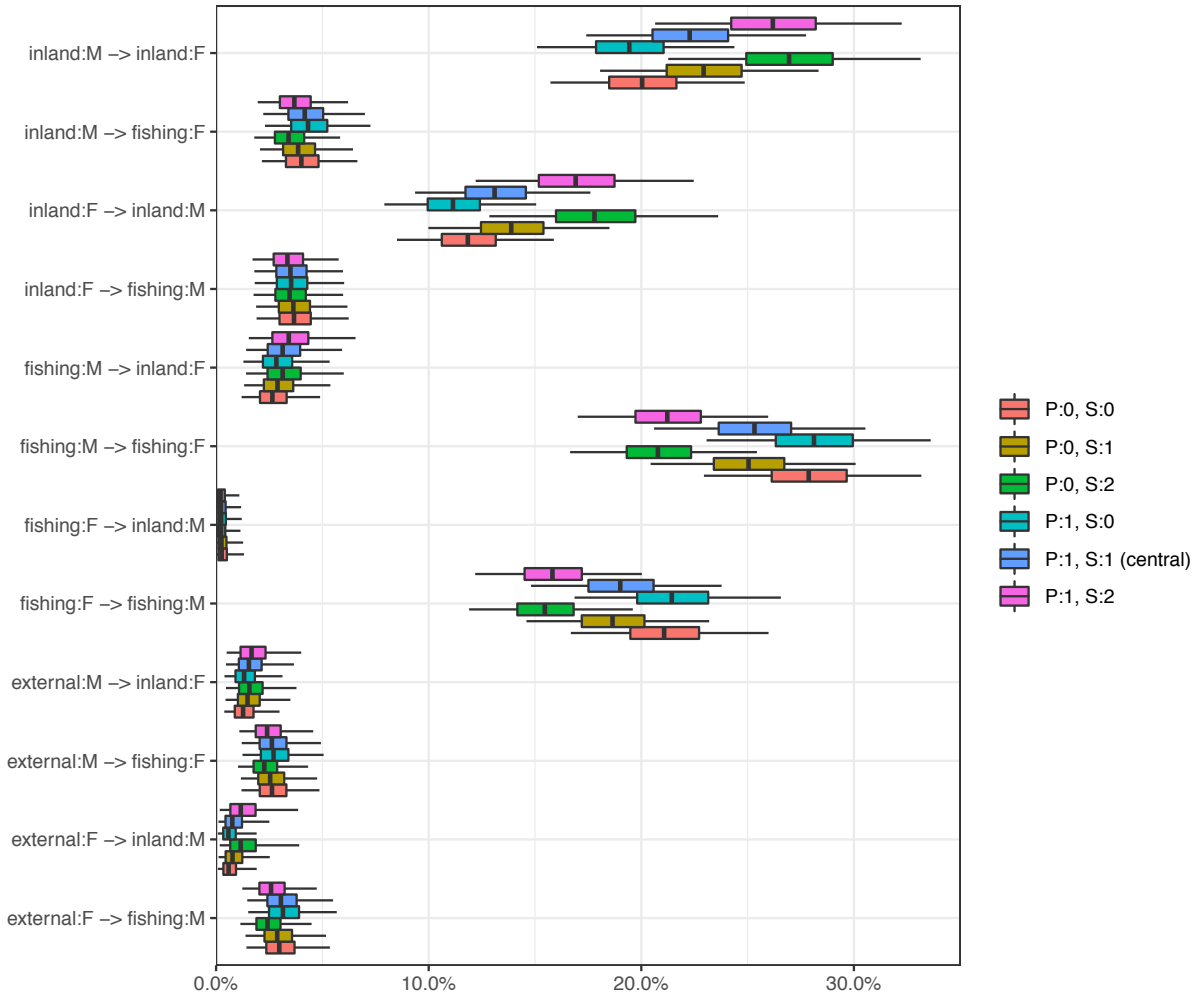

estimated transmission flows  
among RCCS communities

501  
502 **Figure S18. Impact of adjustments for variation in participation rates and for variation in deep-sequencing**  
503 **rates of population groups defined by gender, age, migration status, and RCCS community on estimated**  
504 **transmission flows by gender.**  
505

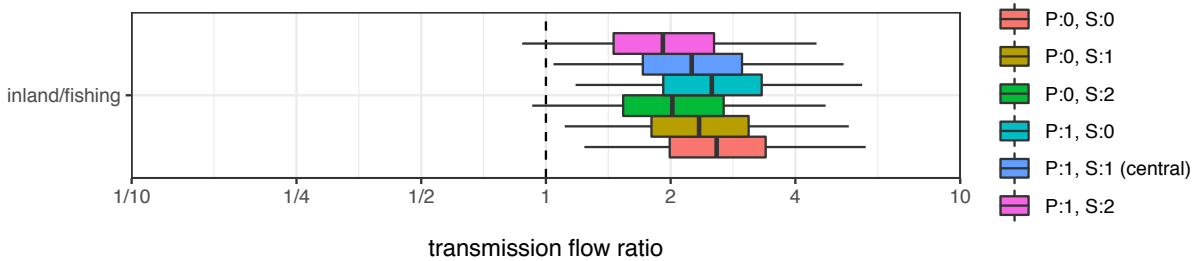

transmission flow ratio

506  
507 **Figure S19. Impact of adjustments for variation in participation rates and for variation in deep-sequencing**  
508 **rates of population groups defined by gender, age, migration status, and RCCS community on the estimated**  
509 **transmission flow ratio from inland communities to fishing communities rather than vice versa.**  
510

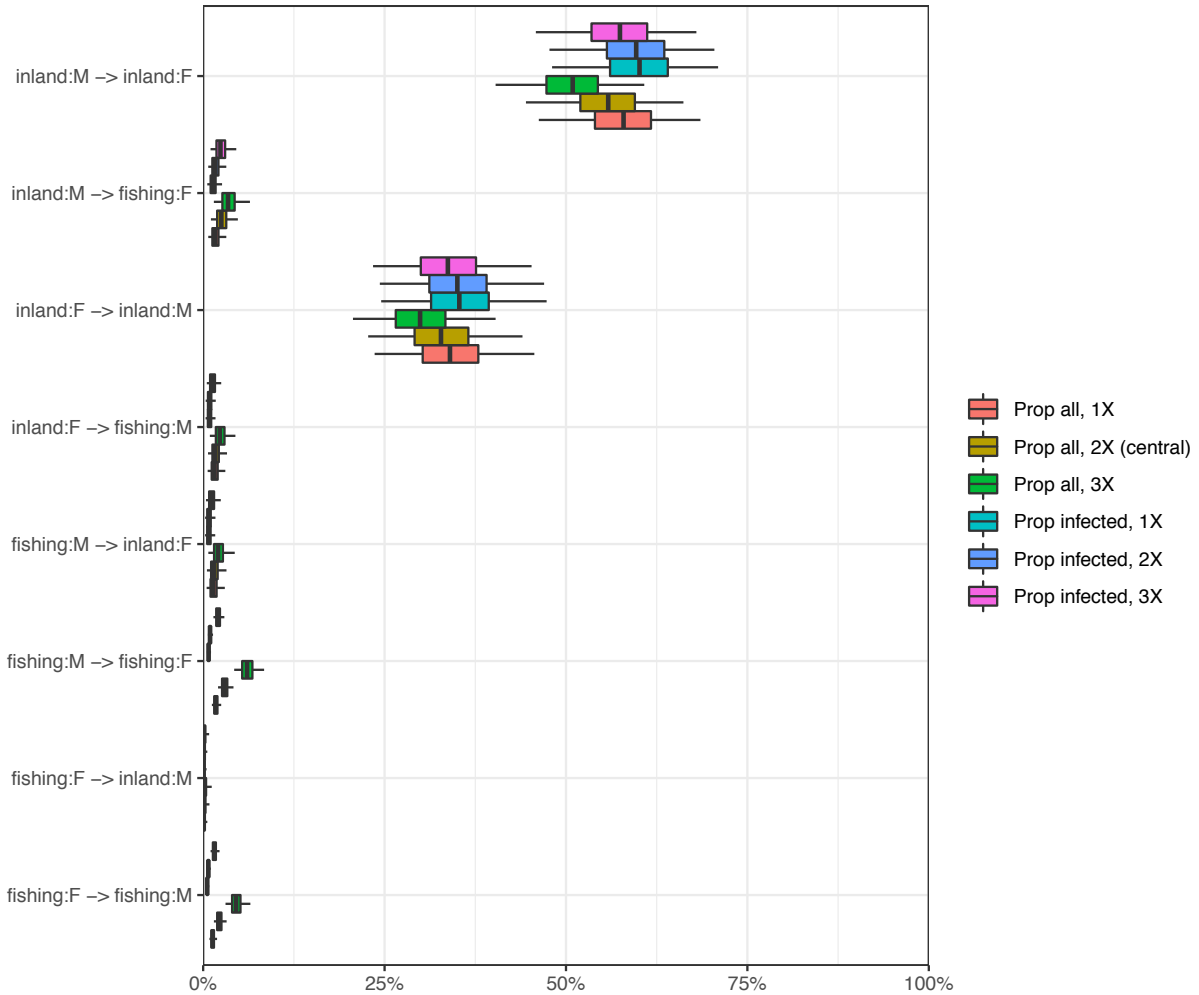

predicted transmission flows  
within and between Rakai inland and fishing area

511  
512 **Figure S20. Impact of population size estimates on predicted transmission flows in inland and fishing areas**  
513 **by gender.**  
514

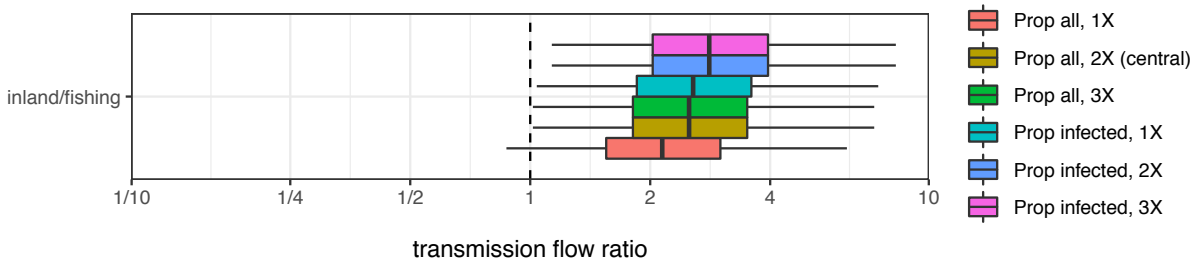

transmission flow ratio

515  
516 **Figure S21. Impact of population size estimates on the predicted transmission flow ratio from inland to**  
517 **lakeside area rather than vice versa.**  
518

519 **Bibliography**

- 520 1. Grabowski MK, Reynolds SJ, Kagaayi J, Gray RH, Clarke W, Chang LW, et al. The validity of self-  
521 reported antiretroviral use in persons living with HIV: a population-based study. AIDS. 2018;32(3):363-9.  
522 2. Grabowski MK, Serwadda DM, Gray RH, Nakigozi G, Kigozi G, Kagaayi J, et al. HIV Prevention  
523 Efforts and Incidence of HIV in Uganda. N Engl J Med. 2017;377(22):2154-66.

- 524 3. Ratmann O, Wymant C, Colijn C, Danaviah S, Essex M, Frost SDW, et al. HIV-1 full-genome  
525 phylogenetics of generalized epidemics in sub-Saharan Africa: impact of missing nucleotide characters in  
526 next-generation sequences. *AIDS Res Hum Retroviruses*. 2017;33(11):1083-98.
- 527 4. Ratmann O, Grabowski MK, Hall M, Golubchik T, Wymant C, Abeler-Dorner L, et al. Inferring HIV-  
528 1 transmission networks and sources of epidemic spread in Africa with deep-sequence phylogenetic  
529 analysis. *Nat Commun*. 2019;10(1):1411.
- 530 5. Wymant C, Hall M, Ratmann O, Bonsall D, Golubchik T, de Cesare M, et al. PHYLOSCANNER:  
531 Inferring Transmission from Within- and Between-Host Pathogen Genetic Diversity. *Mol Biol Evol*. 2017.
- 532 6. Kagaayi J, Chang LW, Ssempijja V, Grabowski MK, Ssekubugu R, Nakigozi G, et al. Impact of  
533 combination HIV interventions on HIV incidence in hyperendemic fishing communities in Uganda: a  
534 prospective cohort study. *Lancet HIV*. 2019;6(10):e680-e7.
- 535 7. Chang LW, Grabowski MK, Ssekubugu R, Nalugoda F, Kigozi G, Nantume B, et al. Heterogeneity  
536 of the HIV epidemic in agrarian, trading, and fishing communities in Rakai, Uganda: an observational  
537 epidemiological study. *Lancet HIV*. 2016;3(8):e388-e96.
- 538 8. Carpenter B, Gelman A, Hoffman MD, Lee D, Goodrich B, Betancourt M, et al. Stan: A  
539 probabilistic programming language. *Journal of Statistical Software* 2017;76(1).
- 540 9. Tatem AJ. WorldPop, open data for spatial demography. *Sci Data*. 2017;4:170004.

541
